# Supplementary material for: Droughts of the Early 19th Century (1790–1830) in Northeast Iberian Peninsula: Integration of historical and instrumental data for high-resolution reconstructions of extreme events
Source: Copernicus journal article supplement (doi:10.5194/egusphere-2024-832), 2024-04-12
Supplement: Supplementary file [file egusphere-2024-832-RC2-supplement.pdf]

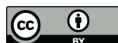

1 **Droughts of the Early 19th Century (1790-1830) in**  
2 **Northeast Iberian Peninsula: Integration of historical**  
3 **and instrumental data for high-resolution**  
4 **reconstructions of extreme events**

5 Josep Barriendos<sup>1</sup>, María Hernández<sup>2</sup>, Salvador Gil-Guirado<sup>3</sup>,  
6 Jorge Olcina Cantos<sup>2</sup>, Mariano Barriendos<sup>4</sup>

7 1: CREAM, Autonomous University of Barcelona, Barcelona, Spain; (j.barriendos@creaf.uab.cat).

8 2: Department of Regional Geographical Analysis and Physical Geography, University of Alicante,  
9 Alicante, Spain; (maria.hernandez@ua.es); (jorge.olcina@ua.es).

10 3: Department of Geography, University of Murcia, Murcia, Spain; (salvador.gill@um.es).

11 4: IDAEA-CSIC, Institute of Environmental Assessment and Water Research, Spanish Research Council,  
12 Barcelona, Spain (mariano.barriendos@idaea.csic.es).

13 *Correspondence to:* Josep Barriendos (j.barriendos@creaf.uab.cat)

14

15 **ABSTRACT.**

16 Drought represents a prevalent climate risk in the Mediterranean region. In the context of climate  
17 change, an increase in both frequency and intensity is anticipated over the next century. In order to  
18 effectively manage future scenarios where global warming overlays natural climate variability, a thorough  
19 analysis of the nature of droughts prior to the industrial age is imperative. This approach incorporates an  
20 extended temporal scale into the study of severe droughts, enabling the identification of low-frequency  
21 drought events that occurred before the instrumental period. The objective of this study is to examine the  
22 occurrence and magnitude of extreme droughts lasting over a year in the Spanish Mediterranean Basin  
23 during the Early 19th Century (1790-1830). To achieve this objective, the research integrates the use of  
24 instrumental observations and information derived from historical documentary sources with daily to  
25 monthly resolutions (e.g. rogation ceremonies). The findings reveal that drought episodes were more  
26 frequent and severe during the Early 19th Century than in the second half of this century. Moreover,  
27 drought episodes of similar severity were rare throughout the 20th Century. Only in the current context of  
28 climate change, over the last two decades, has a pattern of high drought severity been identified that  
29 resembles the severity found during the Early 19th Century (especially between 1812 and 1825). This  
30 study underscores the presence of high variability in drought patterns over the last centuries, justifying the  
31 need for intensified research on drought episodes with high temporal resolution for extended periods.

32 **KEYWORDS.**

33 Early 19th Century, Documentary Sources, Droughts, Drought Indices, Meteorological records, Spanish  
34 Mediterranean Basin.

35



## 36 1. INTRODUCTION

37 Drought is a climate phenomenon defined as a prolonged absence of precipitation that can last  
38 for a few weeks to periods of up to several years (IDMP, 2022). According to the IPCC, drought is an  
39 exceptional period of water shortage for existing ecosystems and the human population (due to low  
40 rainfall, high temperature and/or wind) (IPCC, 2022). Despite their complexity as a natural phenomenon,  
41 droughts should not be confused with aridity, desertification or other related natural risks such as forest  
42 fires or heatwaves (IDMP, 2022; Van Loon, 2015). Drought, as a prolonged lack of precipitation, can be  
43 classified depending on the impacts on the environment and society resulting in distinct types of droughts  
44 such as meteorological, hydrological, agricultural and social (Wilhite & Glantz, 1985).

45 Meteorological drought is defined as a prolonged period with abnormal rainfall deficit for a large  
46 region and for a long period of time (Mishra & Singh, 2010; IPCC, 2022). This absence of rain is  
47 transmitted to the hydrological system by affecting soil moisture and groundwater input, ultimately  
48 reducing surface water levels (Van Loon & Van Lanen, 2012). Thus, hydrological drought is defined as a  
49 period with large runoff and water deficits in rivers, lakes and reservoirs (Nalbantis, 2008; IPCC, 2022).  
50 It also has effects on groundwater and surface hydrology (Mishra & Singh, 2010; Wilhite & Glantz,  
51 1985). This deficit causes a reduction in water supply to plant roots leading to agricultural and ecological  
52 drought (Van Loon, 2015). This type of drought consists of a period of abnormal soil moisture deficit,  
53 which results from combined shortage of rainfall and excess evapotranspiration (Sivakumar, 2011a;  
54 IPCC, 2022). Consequently, during the growing season, it impinges on crop production, leading to  
55 reduced yields and even crop failure (Mishra & Singh, 2010; IPCC, 2022). The different impacts of  
56 drought mentioned above, such as the reduction in water levels or crop failures, have a direct effect on  
57 human societies (Van Loon, 2015). These effects on society caused by a prolonged drought over time are  
58 defined as social drought (Van Loon, 2015). The main impact of drought on society consists on shortages  
59 or limitations in the availability of the water resource and the failure of water supply for different uses:  
60 the worsening of agricultural production, the decrease in energy or industrial production, problems in the  
61 supply of drinking water, or limitations in any recreational or ornamental use of water (Eslamian, et al.,  
62 2017; Mishra & Singh, 2010).

63 All drought types can be characterised by several items: (1) severity (i.e., expressed through the  
64 rainfall values themselves as well as through ceremony levels of *pro pluvia* rogations), (2) duration (i.e.,  
65 from onset to end), (3) spatial extent (i.e. area of impact) and (4) frequency of occurrence (Nalbantis,  
66 2008). Long droughts can cause serious hydrological imbalance gradually increasing its severity (Wilhite  
67 & Glantz, 1985). While magnitude, duration and recurrence are necessary drought features to assess the  
68 physical impacts of droughts on a territory, the vulnerability of the society in relation to degree of  
69 exposure and strategies to cope with the physical hazard are fundamental for a comprehensive evaluation  
70 of climate risk. Beyond contributing to direct water scarcity, droughts affect agriculture, hinder the  
71 production of energy, the access to fresh water and may aggravate political tensions connected to water  
72 rights (Gorostiza et al., 2021). Moreover, the socio-economic impacts of drought generally persist even  
73 when the episode of meteorological or hydrological drought ends and the volume of rainfall returns with  
74 regularity (IDMP, 2022).

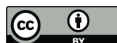

75           Despite the importance of droughts and their capacity to seriously affect the economic and  
76 productive activities of societies, the level of knowledge on this natural phenomenon contrasts with that  
77 of other natural hazards (Van Loon & Van Lanen, 2012). For these reasons it is justified to conduct a  
78 more detailed and systematic study of drought events. It will also take into account the analysis of  
79 specific episodes of lower frequency and greater severity, which may provide additional information on  
80 long term drought behaviour (Olcina, 2001a). Of particular interest are those that have occurred within  
81 the framework of the Mediterranean, where drought is an intrinsic phenomenon of the climate of the  
82 region (Olcina, 2001b).

83           In general terms the Mediterranean climate in the Iberian Peninsula is characterised by a highly  
84 irregular rainfall, both inter-annual and intra-annual (Martín-Vide & Olcina, 2001). Another characteristic  
85 is the pronounced aridity during the warm season (summer) (WMO, 2023). Additionally, presents  
86 important variations in the intra-annual distribution of precipitation depending on the region (Martin-  
87 Vide, 1985). On the eastern of Iberian Peninsula and Balearic Islands, Mediterranean climate type has  
88 two main varieties in relation to the seasonal distribution of rainfall. Between the provinces of Girona and  
89 Almería, main rainfalls are in autumn, with a secondary peak in spring. In the southernmost provinces  
90 (coast of Granada, Málaga and Cádiz) the most abundant rains are recorded in the autumn and winter  
91 months (AEMET, 2011). Autumn rains are mainly linked to cold drop atmospheric situations (Sánchez-  
92 Almodóvar et al., 2022). In the spring, along with this cold drop configuration, convective rains (storms)  
93 take on a prominent role. In the winter, Atlantic storms with a southern trajectory (Gibraltar strait) are  
94 frequent in the south of the Mediterranean strip. In either of these two varieties, summer is always the  
95 season with the lowest rainfall contribution. Annual quantities decrease from north to south between  
96 Girona and Almería (Serrano-Notivoli et al., 2018). In the southern section of this region, rainfall  
97 increases again due to the greater contribution of winter rains (Mathbout et al., 2020). For this reason,  
98 spring and autumn are the key seasons that balance the annual water input. **Strong droughts occur when**  
99 **the summer and winter lack of precipitations connect due to an extraordinary lack of rainfall on the rainy**  
100 **seasons.** These seasonal aspects determine a high temporal variability of water reserves on the Northern  
101 Spanish Mediterranean Basin (Kim & Raible, 2021). In addition, this high vulnerability is magnified by  
102 the eventual impacts caused by droughts (González-Hidalgo, et al., 2018). In this regard, together with  
103 drought, water management in the Mediterranean region have always been a challenge, but now it is  
104 exacerbated within the context of climate change (Hohenthal & Minoia, 2017). Additionally, serious  
105 problems have derived from greater water demands in result of population increase and the spread of a  
106 lifestyle model based on mass consumption of goods and services (IDMP, 2022). In this respect, the  
107 Mediterranean region is a clear example of imbalance between water demand and water availability. As a  
108 result, in recent decades it has become one of hotspots areas impacted by climate change. Along with the  
109 already detected temperature increase, since the beginning of the 21st Century there is also the added  
110 challenge of increased rainfall variability (Barrera-Escoda & Cunillera, 2011). In this context, along with  
111 the increased rainfall irregularity, extended dry periods occur with greater frequency and severity  
112 (Marcos-García, et al., 2017; Kim & Raible, 2021). Therefore, drought in the Spanish Mediterranean  
113 Basin is one of the natural risks with the greatest impact, due to its capacity to cause simultaneous effects



114 on different levels: environmental, economic, social, etc., and also its capacity to last for a long time  
115 (Walker et al., 2010).

116 Because of the impacts of extreme hydrometeorological phenomena in the Mediterranean, such  
117 as droughts and floods, observation of their behaviour in the recent past is justified. Previous work on the  
118 reconstruction of rainfall on a long-time scale generally shows situations of rainfall shortage (Pauling, et  
119 al., 2006; Camuffo, et al., 2012; Smerdon, et al., 2017). As well the results obtained from instrumental  
120 data series highlight that rain shortage (droughts) are perceived at the seasonal level. The present work  
121 aims to analyse the most extreme phenomena detected in the aforementioned paper, but using data that  
122 allow us to analyse rainfall deficits at the monthly level. Unfortunately, for the Iberian Peninsula as a  
123 whole in the study under review there is only one instrumental data series. For this reason, the  
124 instrumental data from the Barcelona station (1786-2022) complement the historical data from the  
125 MILLENIUM project (“European climate of the last millennium”, Code: IP 017008-2). The combination  
126 of instrumental and historical data has been used to study specific periods of anomalous temperature and  
127 rainfall conditions. One such widely studied case is the anomaly of the non-summer year of 1816, a  
128 consequence of the Tambora volcanic eruption (Trigo, et al., 2009; Luterbacher & Pfister, 2015).

129 The Spanish Mediterranean basins are currently experiencing a situation of severe rainfall  
130 shortage. Due to this serious situation, it is necessary to find references of droughts of equal or greater  
131 magnitude in order to understand the characteristics of these phenomena in their most extreme behaviour.  
132 Studies carried out on the Iberian Peninsula to study historical droughts using historical data show  
133 significant results obtained from the use of rogations as a data (Dominguez-Castro, 2012; Tejedor, 2019).  
134 These studies make it possible to identify the importance of the 19th century for its study, highlighting  
135 specific years such as 1817 or 1824 (Dominguez-Castro, 2012). Despite these results, the data used in  
136 these studies were applied to yearly resolutions. The need for knowledge of past droughts adds to the  
137 need to expand the detail of existing studies on historical droughts in the study area.

138 Historical data allow us to observe the behaviour of droughts in much more distant historical  
139 periods than those of the instrumental precipitation data series. Therefore, this data would allow us to  
140 improve the knowledge of drought natural variability over a long-time scale than the instrumental period.  
141 Also, this longer timescale would help to study drought return periods on centennial scale (i.e. lower  
142 frequency droughts) and the duration and magnitude of past extreme droughts (note that only a handful  
143 are available during the instrumental period). In the case of droughts, it is crucial to know those episodes  
144 which occurred in the past and whose severity, extent and duration were exceptional (Gil-Guirado, et al.,  
145 2016).

146 According to all the reasons exposed above, in the current paper we will discuss the topic of the  
147 extreme droughts that affected the Mediterranean Basins of the Iberian Peninsula during the Early 19th  
148 Century (1790-1830). The detailed study of drought events during this period is justified by the physical  
149 and social reasons that underline their exceptionality. The severity of the different droughts recorded,  
150 their cumulative duration and the impact they had on the societies of the Spanish Mediterranean Basins  
151 do not have an equal magnitude in the recent collective memory. On the other hand, this period has been  
152 studied relatively well, thanks to climate reconstructions for the beginning of the 19th Century based on



153 natural and historical *proxy* data and the first instrumental meteorological data series (Brönnimann et al.,  
154 2018b; Prohom et al., 2016).

155 This paper focuses on the impacts caused by meteorological droughts because of the nature of  
156 the data used. The main sources of information used for the analysis of droughts in the historical period  
157 are the instrumental precipitation data sets of Barcelona (Catalonia, NE Spain) and the historical data of  
158 rogations (Spain, with higher density for Catalonia). The case of the rogations differs from that of the  
159 instrumental series, since the former focuses on the lack of precipitation while the rogations would allow  
160 the analysis of agricultural drought (Brázdil et al., 2018). However, rogations also allow meteorological  
161 monitoring of the natural phenomenon, as the ceremonies itself are interrupted when an improvement in  
162 rainfall is detected. This is because of the daily level of detail of the rogation system as a source of  
163 information (Martín-Vide & Barriendos, 1995). The very etymology of the rogations (*pro pluvia*, to  
164 obtain rain as usual) demonstrates the meteorological nature of the ceremony. Their purpose was not  
165 directly to obtain a large harvest, but to achieve a good rainfall episode.

#### 166 1.1. Research background

167 The Early 19th Century (1790-1830) occurred during the climate episode named as the Little Ice  
168 Age (hereafter, LIA) between the fourteenth and nineteenth centuries (Grove, 1988). This climate  
169 oscillation was clearly characterised by lower average temperatures with respect to the previous episode  
170 (Medieval Warm Period) and the subsequent episode (Current Global Warming) (Fischer et al., 2007).  
171 Another significant aspect of the LIA is the irregular behaviour of rainfall, with a clear increase in the  
172 frequency and magnitude of severe hydrometeorological events (Barriendos et al., 2019, Oliva et al.,  
173 2018). In the case of the Iberian Peninsula, different oscillations were observed including increases in  
174 heavy rains or droughts throughout this period (Barriendos, 1996). One of the most exceptional  
175 oscillations is called Maldà Oscillation, which occurred between 1760 and 1800 (Barriendos & Llasat,  
176 2003). The Maldà Oscillation was characterised by simultaneous increases in the frequency of heavy rain  
177 events, alternating with droughts. The alternation of extreme rainfall and droughts events had strong  
178 social and economic impact on the Iberian Peninsula. Specifically, the sequence of droughts, cold snaps  
179 and snowfalls had serious direct consequences on agriculture, while consecutive floods also damaged or  
180 destroyed many infrastructures. Furthermore, during the period of the Maldà Oscillation there was an  
181 emergence of uncommon epidemic diseases, such as smallpox or yellow fever viruses, occurring at the  
182 same time than more common diseases such as epidemic malaria or typhoid (Barriendos & Llasat, 2003;  
183 Alberola, 2010; Alberola & Arrijoja, 2018).

184 Within the LIA, the Early 19th Century was characterised by an abnormally low amount of  
185 emitted solar radiation, which generated an overall decrease in the amount of solar radiation arriving to  
186 the Earth (Prohom et al., 2016). In addition to this external forcing factor, climate variability at the end of  
187 the LIA was also affected by several volcanic eruptions that occurred between 1790 and 1830 (Fang et al.,  
188 2023). Of these eruptions, 247 had an  $VEI \geq 2$ ; 35 had a  $VEI \geq 3$ ; 16 had a  $VEI \geq 4$ ; 2 had a  $VEI \geq 5$ ; 1  
189 had a  $VEI \geq 6$  and 1 had a  $VEI \geq 7$  (Global Volcanism Program, 2023). Among these volcanic eruptions,  
190 stand out a sequence of large explosive volcanic eruptions (Wagner & Zorita, 2005; Prohom, 2003):  
191 *Unknown* (1808), Tambora (1815), Galunggung (1822) and Cosigüina (1835). Some studies indicate that



192 the high intensity volcanic eruptions, occurring between the LIA and the current Global Warming, led to  
193 a decrease in temperatures, together with an increase in rainfall irregularity in the study area (Gil-Guirado  
194 et al., 2020).

195         Among the three eruptions of the Early 19th Century, the 1815 Tambora eruption is considered  
196 one of the most significant of the past two thousand years in terms of the particles emitted (Raible, et al.,  
197 2016). Also, it is considered as the cause of the most pronounced climate anomaly of the first third of the  
198 19th Century (Brönnimann et al., 2018b). Due to his outstanding volcanic explosivity (VEI 7), this  
199 eruption was the largest and most devastating eruption recorded in the historical age and is considered to  
200 be responsible for the “year without a summer” of 1816 reported across Europe and North America  
201 (Trigo et al., 2009; Luterbacher & Pfister, 2015). Central Europe, Western Europe and Northern Europe,  
202 with temperatures recorded of between 2 to 3°C below the average in areas of Spain and Portugal (Pfister  
203 & White, 2018) were the greatly affected regions by this “year without a summer”. During that summer  
204 the number of rainy days almost doubled and cloudy days were more frequent in the whole of Europe and  
205 North America. Alterations in the usual general atmospheric circulation pattern and its centres of action  
206 were also reported as a result of cooling due to the direct effect of the reflection of incident radiation  
207 associated to the presence of volcanic aerosols (Brönnimann et al., 2018b).

208 This study has found a time period in which there is an accumulation of particularly severe drought  
209 episodes. This period coincides chronologically with Dalton Solar Minimum and an anomaly in volcanic  
210 activity (eruptions of Tambora and other volcanoes mentioned). Obviously, the chronological coincidence  
211 does not presuppose any cause-effect relationship between the anomalies in solar and volcanic activity  
212 and the pluviometric anomalies under study.

## 213 1.2. Historical Droughts Studies in Spain

214         The analysis of historical droughts in Spain dates back to studies by Manuel Rico y Sinobas in  
215 the mid-19th Century, in which he analysed the impacts of drought episodes on agriculture. His main  
216 objective was to compile records in order to obtain a broad temporal dimension of the phenomenon (Rico  
217 y Sinobas, 1851). Subsequently, and until the beginning of the 1990s, only sporadic studies were carried  
218 out that were in some way related to events (Bentabol, 1900). One exception is the study by Couchoud  
219 (1965), who analysed the region of Murcia in depth (SE Spain) based on a detailed compilation and  
220 analytical process. In 1994, two PhD theses on historical climatology that engaged with droughts were  
221 defended in Spain (Barriendos, 1994; Sánchez Rodrigo, 1994). They constitute benchmark studies in the  
222 research on this topic. From this decade onwards, there has been a proliferation of studies and  
223 publications in which drought is taken into consideration (see, among other, Sánchez Rodrigo, et al.,  
224 1994; Martín Vide & Barriendos, 1995; Sánchez Rodrigo, et al., 1995; Barriendos, 1997; Barriendos &  
225 Martín Vide, 1998; Sánchez Rodrigo, et al., 1998), including manuals on natural risks (Olcina, 2001a).  
226 More recently, a new PhD thesis (Gil-Guirado, 2013) once again insisted on the need to study historical  
227 droughts in the Spanish Mediterranean Basin based on a quantitative approach.

228         In addition to PhD theses, there are also recent publications focused on the study of historical  
229 droughts using a quantitative approach. An example that actually corresponds to the period analysed in  
230 present work is the paper focused on droughts for the Iberian Peninsula (1750-1850) (Dominguez-Castro



231 et al., 2012). This article approaches the severe episodes of historical droughts by means of rogations at  
232 annual resolution. Other studies have continued this line of research in the Iberian Peninsula (Trigo et al.,  
233 2009; Fragoso et al., 2018; Tejedor et al., 2019; Bravo-Paredes, 2020) and even in more detail for the  
234 Ebro basin (Cuadrat et al., 2022). The availability of pro-pluvia rogations in the Hispanic Monarchy  
235 extended beyond the Iberian Peninsula, as evidenced by works in Mexico and all Central American  
236 countries (Garza-Merodio, 2017; Alberola & Arriola, 2018; Ramírez-Vega, 2021). Rogations are a  
237 liturgical mechanism used in other Catholic countries and therefore these studies can be extended to this  
238 broader religious sphere (Garnier, 2019; Pfister, 2018). Finally, the amount of information that is  
239 becoming available is already being organised in comprehensive databases such as AMARNA or in  
240 international initiatives (Domínguez-Castro et al., 2021).

241 Parallel to the research based on rogations, the study of historical droughts in the Iberian Peninsula has  
242 also been carried out through the analysis of ancient instrumental precipitation data series as well  
243 (Prohom et al., 2016). Or with the combination of data on rogations and precipitation series analysed by  
244 means of drought indices (Tejedor et al., 2019). These studies allow us to observe severe droughts based  
245 on inter-annual variability.

### 246 1.3. Objectives

247 The main objective of this study is to analyse the patterns of drought episodes that affected the  
248 Northeast of the Iberian Peninsula during the Early 19th Century (1790-1830) using instrumental and  
249 historical sources. This period that corresponds to the last stages of the Little Ice Age was chosen due to  
250 severity of drought occurring in the Mediterranean Basins of the Iberian Peninsula. Additional objectives  
251 of this study are: 1) to qualitatively and quantitatively extend the AMARNA database on climate risks  
252 (*Arxius Multidisciplinars per a l'Anàlisi del Risc Natural i Antròpic*, from catalan: Multidisciplinary  
253 Archives for the Analysis of Natural and Anthropogenic Risk) to incorporate droughts and different social  
254 processes linked to environmental impact in addition to hydro-meteorological excesses (Tuset et al.,  
255 2022); 2) to compile and describe the variability of extreme hydrometeorological events (heavy rainfall  
256 and droughts) in the Spanish Mediterranean Basin during the Early 19th Century. In order to study how  
257 the opposite extreme events behave and interact with each other. Also to understand if the behaviour of  
258 past hydrometeorological extremes is similar to the modelled behaviour for the future in the study area. In  
259 addition, the spatio-temporally coherent periods of climatic anomalies have among their main  
260 characteristics the increase in rainfall irregularity in the study area (Gil-Guirado et al., 2016); 3) to  
261 characterise the drought episodes, analysed from historical data, considering their duration, extension and  
262 severity in high resolution for the period analysed; and 4) to analyse the entire instrumental precipitation  
263 data series of Barcelona (1786-2022) for the whole duration of the series in order to characterize periods  
264 of drought.

265 In order to fulfil these objectives, the paper analyses the historical and instrumental data  
266 available in the Spanish Mediterranean Basins, using different time and spatial scales. The socio-  
267 environmental context during the Early 19th Century is analysed using data compiled from historical  
268 documentary sources, namely the records of the *pro pluvia* rogation ceremonies held in the main villages  
269 of the affected regions. These data are compared with the analysis of the instrumental precipitation data



270 series of Barcelona (1786-2022) based on different statistical techniques, including the use of three  
271 drought indexes: SPI (McKee et al., 1993), SPEI (Vicente-Serrano et al., 2010) and Deciles (Gibbs &  
272 Maher, 1967).

273 The article focusses on analysing climate variability during the Early 19th Century period and  
274 provide the state of the art on droughts in historical perspective in Spain and Europe as a whole.  
275 Subsequently, the results obtained are presented through graphic and cartographic resources.

## 276 2. MATERIALS AND METHODS

### 277 2.1. Sources of information

278 The sources of information used to analyse droughts in the Early 19th Century consist mainly of historical  
279 data and the Barcelona instrumental precipitation data series ranging from 1786 to the present day. The  
280 historical data on droughts in the Spanish Mediterranean Basin during the Early 19th Century was  
281 obtained from Documentary sources of public administrations and ecclesiastical institutions compiled in  
282 the AMARNA database (Barriendos & Barriendos, 2021; Tuset et al., 2022). AMARNA is an archive that  
283 compiled climate historical episodes from different documentary sources which are geo-referenced and  
284 classified into numerical categories on a daily resolution. The information from AMARNA refers to any  
285 type of extreme meteorological event and its social impacts. Events about which there is more  
286 information are those relating to water excess (persistent rainfall, pluvial and fluvial floods) and rainfall  
287 deficits (droughts). The total number of records for the period EC 1035-2022 amounts to slightly more  
288 than 19,000 cases, organised in more than 5,500 episodes (Tuset et al., 2022). Sources of information are  
289 mainly administrative and private documentary sources, with direct descriptions of events and their  
290 impacts. The institutional documentary sources also provide systematic and continuous records over time  
291 throughout the existence of the institution, with resources and conditions that favour the conservation and  
292 access to the documents (Martín-Vide & Barriendos, 1995; Brönnimann et al., 2018a). Water deficits are  
293 obtained from the records of *pro pluvia* rogation ceremonies (cultural-historical proxy) from municipal  
294 and local ecclesiastical sources (Brázdil, et al., 2018). Rogations are the main *data proxy* in order to  
295 identify and compile information on droughts in the Spanish Mediterranean Basin. The records of these  
296 ceremonies are generated and initiated by public authenticators in collegiate administrative bodies  
297 (municipal councils, cathedral councils), which guarantees the reliability of the document itself and the  
298 veracity of the information contained therein. The rogation records contain reliable and homogeneous  
299 information due to their institutional origin and the formal rigidity of the related liturgical procedures  
300 (Brázdil, et al., 2018). The documentary record of the rogation ceremony informs of the location, the date  
301 and duration of the drought conditions. With respect to the severity of the event, the application of a  
302 specific methodology based on the type of liturgical acts used enables their classification by categories  
303 and their numerical indexing (Martín-Vide & Barriendos, 1995; Barriendos, 1997). As a complement to  
304 these administrative sources, AMARNA also uses private personal sources, such as appointment books,  
305 memoirs or chronicles.

306 Rainfall excesses are also found in the same administrative documentary sources as the deficits  
307 and their cataloguing and numerical classification procedure is also based on objective indicators. In the





308 1990s, simple and easy to cross reference classification criteria were proposed for all of the European  
309 basins, based on the levels of river overflows and the damage recorded (Barriendos & Martín-Vide, 1998;  
310 Brázdil et al., 1999). The first studies that used these information sources in the area of study sought to  
311 conduct an overall reconstruction of the climate variability through the generation of weighted annual  
312 indices (Barriendos, 1996; Barriendos, 2005). Subsequent studies extended the analysis with annual  
313 indices for different locations of the Spanish Monarchy, both on historical floods (Barriendos & Sánchez  
314 Rodrigo, 2006) and for droughts (Domínguez-Castro et al., 2008; Domínguez-Castro et al., 2012;  
315 Sánchez Rodrigo & Barriendos, 2008, Tejedor et al., 2019; Gil-Guirado, et al., 2019).

316 In addition to the analysis of historical data, the second part of the study consists in the statistical  
317 analysis of the instrumental precipitation data series of Barcelona spanning from 1786 to 2022.  
318 Unfortunately, the Barcelona set is the only continuous rainfall series available in the study area for the  
319 Early 19th Century. This information is scarce for such a large geographical area, but the Barcelona series  
320 is located in the area with the most historical information available for this period. Therefore, the joint  
321 analysis of instrumental and historical information is relatively consistent.

322 The Barcelona rainfall series has been compiled by consulting several documentary sources and  
323 different sets of records. The principal source was elaborated by the Meteorological Service of Catalonia,  
324 *Servei Meteorològic de Catalunya* (SMC) (Prohom et al., 2016). This was compiled from different  
325 institutional observers who generated records during the 18th and 19th centuries in the centre of  
326 Barcelona (at around 30 meters above sea level). For the 20th Century the records were generated at the  
327 Fabra Observatory, placed outside of the city (at the Tibidabo mountain, at 412 meters above sea level).  
328 The analysis of these sources has enabled the homogenisation of the monthly precipitation data sets from  
329 1786 to 2014. To complete the SMC series up to the year 2021, instrumental records from a private  
330 observatory in the Can Bruixa neighbourhood of Barcelona was used. For the year 2022, data was from  
331 the official SMC Raval automatic station (University of Barcelona). These two sets are validated by the  
332 SMC and their data have been collected in the centre of the city of Barcelona, making their values closer  
333 to those collected at the beginning of the series.

## 334 2.2. Indexation system of historical climate data

335 This study is based on the use of information on a daily scale drawn from the historical data  
336 obtained from the AMARNA database. This information is organised into cases and episodes. Every  
337 episode consists of a group of cases or records of different dates and locations which provide information  
338 about the impact and duration of each episode. Cases are the basic units of documentary record in which  
339 there is mention of some kind of impact on the water deficit. They may be decisions by the authorities to  
340 initiate or continue *pro pluvia* rogations, qualitative records of rainfall within a drought episode, or  
341 records of the decisions taken by the authorities to end the rogations once the drought is considered to be  
342 over. The cases and episodes are classified into five categories and fifteen sub-categories (Barriendos &  
343 Barriendos, 2021) (Table 1). These fifteen thematic subdivisions proposed correspond to the highest  
344 degree of detail observable in the documentary and bibliographic sources consulted (Table 1). For the  
345 specific case of drought episodes (DR), these come mostly from records of the celebration of *pro-pluvia*  
346 rogation ceremonies. These records provide information on both the duration and severity of drought



347 events. By having the dates on which each ceremony is held, we can identify both the beginning and the  
 348 end of the rogations, along with increases in severity. The type of ceremonies held in order to ask for rain  
 349 will define the severity of the episode, which are organised between 1 and 5 (Martín-Vide & Barriendos,  
 350 1995; Barriendos, 1997). A level 1 rogation marks the beginning of each drought episode and a gratitude  
 351 ceremony marks the end of the episode. Each drought episode will thus have a different duration and its  
 352 severity will be defined by the ceremonies between the first rogation and the closing of the ceremonies.

| CATEGORIES |                                | SUB-CATEGORIES |                     |
|------------|--------------------------------|----------------|---------------------|
| Code       | Name                           | Code           | Name                |
| ERE        | Extraordinary Rainfall Event   | FF             | Fluvial Flood       |
|            |                                | PF             | Pluvial Flood       |
|            |                                | PR             | Persistent Rainfall |
|            |                                | SS             | Sea Storm           |
|            |                                | DR             | Drought             |
| ECE        | Extraordinary Convective Event | HE             | Hail Event          |
|            |                                | ES             | Electric Storm      |
|            |                                | WS             | Wind Storm          |
| ETE        | Extraordinary Thermic Event    | CW             | Cold Wave           |
|            |                                | US             | Unusual snowfall    |
|            |                                | HW             | Heat Wave           |
| SIE        | Social Impact Event            | EE             | Epidemic Event      |
|            |                                | PE             | Plague Event        |
|            |                                | FS             | Food Shortage       |
| ERR        | Technical mistake              | ERR            | Spurious case       |

353 **Table 1: Classification system of the AMARNA database** (Barriendos & Barriendos, 2021).

354 The AMARNA database originally only provided data on water excesses recorded in historical  
 355 periods for the Spanish Mediterranean basins (Tuset et al., 2022). An effort is currently being made to add  
 356 data on droughts to the AMARNA database. In this regard, the period from 1790 to 1830 has been a test  
 357 to see how the recently gathered data on droughts and the existing data on excess water fit together. Thus,  
 358 the work proposed in this article supposed progressing from 0 cases and episodes of drought for the Early  
 359 19th Century, to the values with which the study has been carried out. The AMARNA database is still  
 360 under development for other historical periods and therefore not yet available for public access.

361 The georeferencing of all the historical data compiled in the AMARNA database allowed the use  
 362 of SIG tools for the cartographic representation of this historical information. The distribution of the  
 363 droughts in the Early 19th Century have been represented both on a municipal level and with the cases  
 364 grouped by hydrographic basin. These are the Spanish administrative units for managing water resources  
 365 (Figure 1) (MITECO, 2023). The organization at a municipal level allow the analysis of the time-space  
 366 distribution of the impacts caused by different drought episodes representative of the period of study. The  
 367 different efforts to compile data on the AMARNA database on water excesses and droughts have resulted  
 368 in a very characteristic distribution of data for the case of the Early 19th Century period (Figure 1). Most  
 369 of the points with information on water excesses collected in AMARNA are located in the Spanish  
 370 Mediterranean basins. On the other hand, the information on droughts covers points all over Spain, but  
 371 with a higher density in the territory of Catalonia, between the CHE and the CIC hydrographic basins, and  
 372 Murcia city (CHS) (Figure 1). This disproportion in the amount of information between the Atlantic and  
 373 Mediterranean basins is due to the effort focused on the latter, where there is more interest in the study of



374 hydrometeorological phenomena. Therefore, as the title of the paper indicates, the analysis of drought on  
 375 the Northeast Iberian Peninsula uses information from the Atlantic basin of the Iberian Peninsula only as a  
 376 reinforcement or complement for a better characterisation of the episodes identified.

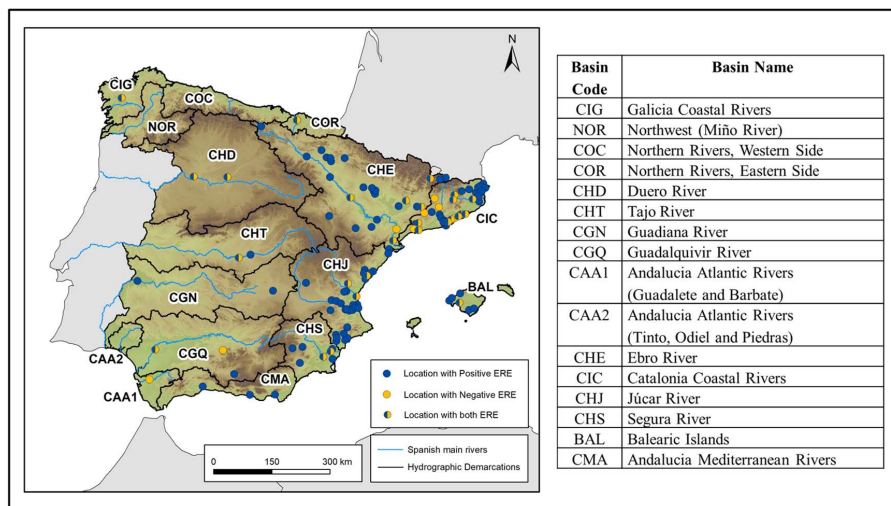

377  
 378 **Figure 1: Spanish hydrographic basins analysed in this study. Locations with historical information for the**  
 379 **Early 19th Century. This specifies the locations that have records on positive ERE (FF, PF, PR and SS),**  
 380 **negative ERE (DR) or both types of ERE.**

381 **2.3. Generation of drought indices**

382 Several drought indices were generated using the Barcelona precipitation data series (1786-  
 383 2022). In all cases, the indexes were calculated based on monthly values and for groups of 12 months.  
 384 The SPI (*Standardized Precipitation Index*) (McKee et al., 1993) was the first index calculated, which is  
 385 widely used for classifying droughts (WMO & GWP, 2016). This index enables the analysis of the  
 386 duration and variability of droughts, as well as of the wet periods and is generated based on the  
 387 transformation of the temporal precipitation data series in a standardised normal distribution (Lloyd-  
 388 Hughes & Saunders, 2002; Gil-Guirado & Pérez-Morales, 2019; Zargar et al., 2011). The second index is  
 389 the SPEI (*Standardized Precipitation Evapotranspiration Index*) (Vicente-Serrano et al., 2010), which is  
 390 similar to the SPI index, but also uses the average monthly temperature variable (WMO & GWP, 2016).  
 391 It is a relatively versatile index, simple to apply and enables analyses to be carried out for any climate  
 392 regime (Stage et al., 2015). The third index used is the Deciles index (Gibbs & Maher, 1967), which  
 393 stands out for its applicability and simplicity, due to the facility of the calculations that it requires and the  
 394 fact that it only requires precipitation data (Hayes & Cavalcanti, 2005; Tsakiris, et al., 2007). This method  
 395 is obtained by dividing the distribution of the monthly precipitation data into deciles (WMO & GWP,  
 396 2016), which define thresholds for different water deficit conditions (Eslamian et al., 2017; Zargar et al.,  
 397 2011).

398 Statistical analyses were conducted with the results of the three indices. Testing of trends was  
 399 carried out using the Mann Kendall test and with the Sen slope. Analysis of breakpoints of the monthly  
 400 series was conducted using the Pettitt Test (Gil-Guirado & Pérez-Morales, 2019).



401 Based on the results obtained in the different drought indices, a criterion has been defined to  
 402 organise the different drought episodes detected for the Early 19th Century. This criterion takes the values  
 403 obtained with the SPI as a reference to define each episode. Each drought episode must have at least six  
 404 consecutive months with SPI values lower than "-1". The count of the total number of months of the  
 405 drought episode starts and ends when the SPI values are below "-0.75".

### 406 3. RESULTS

#### 407 3.1. The hydro-meteorological extremes in Spain (1790 - 1830)

408 The AMARNA database used in this paper provides a total of 19115 cases spread over 5,551  
 409 episodes for the period from 1035 to 2022. For the Early 19th Century (1790-1830), the AMARNA  
 410 database provides for the whole of the Iberian Peninsula 2047 cases, which are grouped into 708 episodes  
 411 (Barriendos et al., 2019).

412 From the 2047 total number of cases 1789 cases correspond to ERE events (Extraordinary Rainfall  
 413 Event). Within the ERE cases, there is a clear predominance of the subcategory DR (Drought), with 64%  
 414 of the ERE cases (Table 2).

| Subcategories            | Number of cases | Percentage |
|--------------------------|-----------------|------------|
| Fluvial Flood (FF)       | 431             | 24.09%     |
| Pluvial Flood (PF)       | 40              | 2.24%      |
| Persistent Rainfall (PR) | 164             | 9.17%      |
| Sea Storm (SS)           | 22              | 1.23%      |
| Drought (DR)             | 1132            | 63.28%     |
| Total                    | 1789            |            |

415 **Table 2: Total number of cases of the five groups making up the ERE category (Extreme Rainfall**  
 416 **Event). Elaboration from AMARNA database.**  
 417

418 The temporal distribution of the ERE episodes throughout the Early 19th Century reveals a  
 419 predominance of droughts with respect to the other types of ERE, but with a non-homogeneous  
 420 distribution (Figure 2). For instance, between 1790 and 1800 rainfall was abundant, so floods were more  
 421 significant than droughts in years such as 1793, 1797 or 1801 (Figure 2). This decade also stands out due  
 422 to its clear irregularity across different years, which can be related to the final part of an abnormal climate  
 423 period detected between 1760 and 1800, known as the Maldà Oscillation (Barriendos & Llasat, 2003).  
 424 The 5-years moving averages show the most pronounced episodes of droughts and water excesses during  
 425 this period. Figure 2 highlights its temporal distribution: in the first decade, positive extreme peaks were  
 426 interrupted with the drought of 1798. On the other hand, from the episode of 1807, droughts became  
 427 predominant, being particularly severe between 1812 and 1825 (Figure 2). The positive EREs cases  
 428 diminished from 1806 definitively for the rest of the Early 19th Century, while the negative EREs  
 429 increased from 1812. Between these two well defined periods exists a transition period with low number  
 430 of heavy rainfalls or droughts.

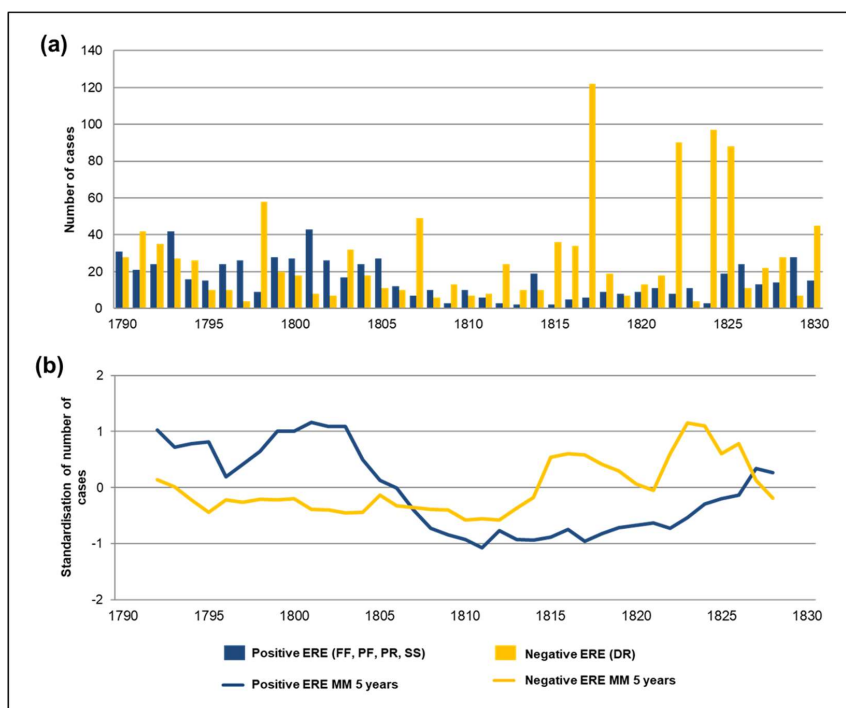

431  
432  
433  
434  
435

**Figure 2: a) Temporal distribution of positive EREs and negative EREs during the Early 19th Century (1790-1830). b) Annual cases of positive EREs and negative EREs during the Early 19th Century (1790-1830). 5-years moving averages of the standardised values for the positive EREs and negative EREs. Elaboration through AMARNA database.**

436

The geographical distribution of ERE cases for this period also provides interesting information. It is highlighted the large number of cases recorded in the Spanish Mediterranean Basin against those recorded in the Atlantic basins for the same period (Figure 3). The Guadalquivir basin (CGQ) is the only Atlantic basin with an important amount of ERE cases. The predominance of drought in the Spanish Mediterranean basins contrasts with the greater impact of the positive ERE episodes in the Atlantic basins. In the Mediterranean area, the Júcar basin (CHJ) stands out as there is a high incidence of positive ERE, unlike the dynamics of the other Mediterranean basins. This bias can be applied to the CHJ, NOR, CGN and CMA basins. For this reason, in the basins that suffer this bias, the majority of the information corresponds only to the episodes of positive ERE.

445

The towns that account for more than 50 cases of drought were all spatially distributed across the Mediterranean basins, except for Seville, located in the Atlantic watershed (Figure 4). Regarding the drought temporal distribution at the different cities, Murcia case is noteworthy by the regularity of drought episodes compared to the majority of the other cities that exhibit larger temporal variability (Olcina, 2001b). This fact is related to its geographical position in the South-east of Spain. Within this environment, “specific” drought events occur (the so-called “surestinas” south-eastern droughts) related to the lack of precipitation from the Atlantic and absence of Mediterranean rainfall events (Olcina, 2001b).

452

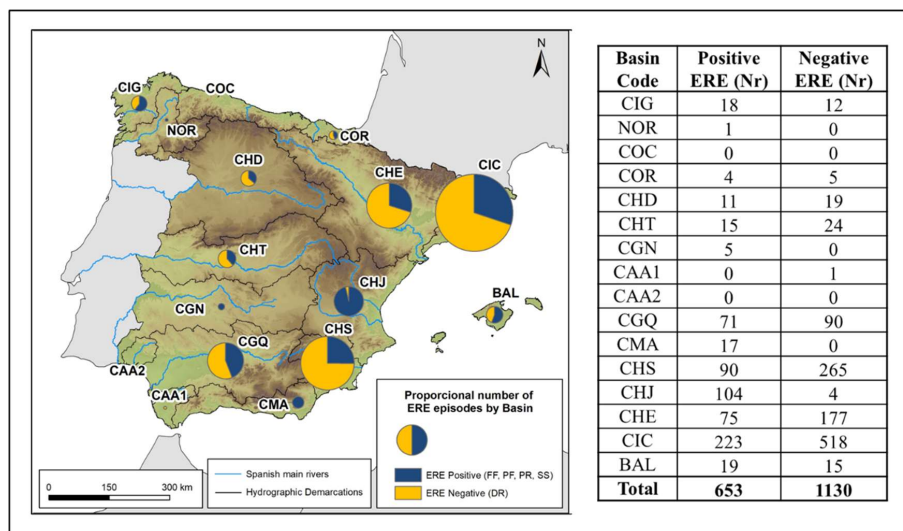

453  
454  
455  
456

Figure 3: Number of positive ERE cases (FF, PF, PR, SS) and negative ERE cases (DR) for the different Spanish river basins during the Early 19th Century (1790-1830). A list of the full names of the basin codes can be found in Figure 1. Elaboration from AMARNA database.

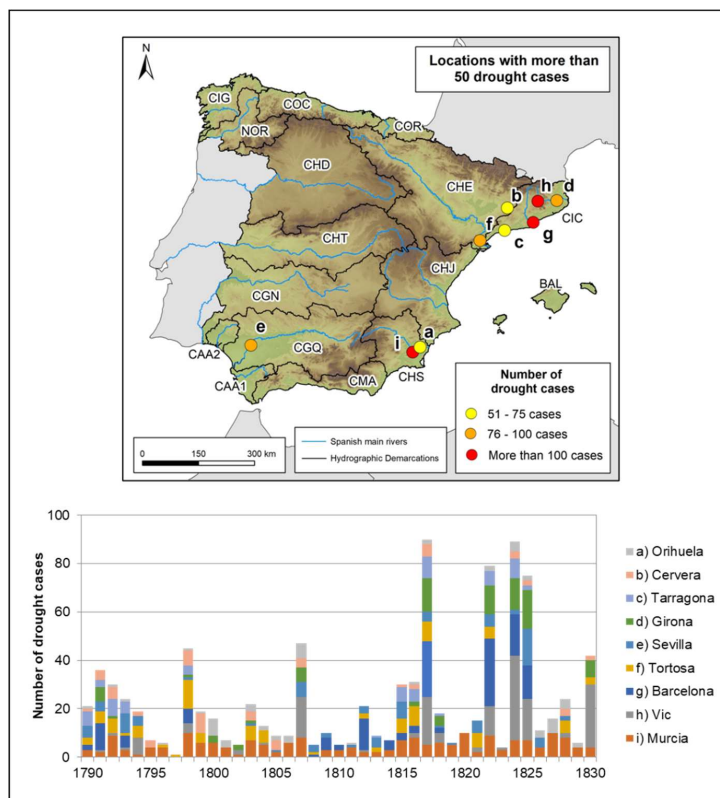

457  
458  
459

Figure 4: Towns with more than 50 cases of drought during the Early 19th Century. Elaboration from AMARNA database.

460



461 **3.2. Drought analysis of the Early 19th Century on the Spanish Mediterranean Basin**

462 Table 3 shows historical data from the most severe drought episodes of the Early 19th Century  
 463 based on all the cases from all the Spanish towns that record rogation ceremonies for each drought  
 464 episode. In this regard, it will be possible to consider the different nuances that appear in the most  
 465 representative droughts of the analysed period.

| Episode    | Year of greatest impact (N° Cases) | Approximate duration | Total cases |
|------------|------------------------------------|----------------------|-------------|
| 1798 -1799 | 1798 (58)                          | 25 months            | 78 cases    |
| 1807 -1808 | 1807 (49)                          | 19 months            | 55 cases    |
| 1812 -1814 | 1812 (24)                          | 21 months            | 44 cases    |
| 1816 -1818 | 1817 (122)                         | 37 months            | 175 cases   |
| 1822 -1825 | 1824 (97)                          | 40 months            | 279 cases   |

466 **Table 3: Summary of the severe drought episodes according to historical data for the Early 19th Century.**  
 467 **Elaboration from AMARNA database.**

468 The first of these episodes runs from December 1797 to December 1799, with the peak of  
 469 intensity in March and April 1798. This episode stands out as it occurred several years before the  
 470 megadrought of 1812-1825 and was possibly an episode still linked to Maldà Oscillation (Barriendos &  
 471 Llasat, 2003). It affected five hydrographic basins (Catalan basins, Ebro, Segura, Tagus and  
 472 Guadalquivir), three of which are Mediterranean (Figure 5). Despite its considerable extension, this  
 473 episode had a limited duration, with only a few months of rogations. The exception is the municipality of  
 474 Murcia, where rogations were recorded for 10 of the 25 months that the episode lasted. Furthermore, this  
 475 episode was noteworthy in this town due to plague outbreaks (Zamora Pastor, 2001).

476 The second episode of severe drought occurred between January 1807 and July 1808 (Figure 5),  
 477 with the largest number of cities holding rogations in October 1807. It affected six river basins (Catalan  
 478 basins, Ebro, Balearic basins, Segura, Duero and Guadalquivir), four of which are Mediterranean. Its  
 479 main characteristic is that it had a greater impact on towns in the southern sector of the Atlantic and  
 480 Mediterranean watersheds of the Peninsula, such as Murcia and Seville.

481 The third episode accumulated less cases of drought but marked the beginning of the  
 482 megadrought that lasted until 1825, with different regional effects throughout the sequence. It occurred  
 483 between March 1812 and April 1814 with the peak of greatest severity in April 1812 (Figure 5). Despite  
 484 the low number of rogations recorded (44), significant effects on crops were documented, causing wheat  
 485 shortages and widespread famine in the Mediterranean basins. It had a broad impact across the Iberian  
 486 Peninsula, affecting eight river basins (Catalan basins, Ebro, Balearic basins, Júcar, Segura, Duero, Tagus  
 487 and Guadalquivir), three of which are in the Atlantic watershed.

488 **The fourth episode runs between December 1815 and November 1818** (Figure 5) and stands out  
 489 for the impact of the drought during 1817, which was very severe in Catalonia with instrumental records  
 490 in Barcelona that were unprecedented until then (Moruno, 2021). In this episode, there was an  
 491 exceptionally dry month (April 1817) in which fourteen of the twenty municipalities recorded *pro pluvia*  
 492 rogations. This drought affected eight very broadly distributed river basins; four Mediterranean basins  
 493 (Catalan basins, Ebro, Balearic basins and Segura) and four Atlantic basins (Galician basins, Duero,



494 Tagus and Guadalquivir). Rogations were made during this drought for many months, particularly in the  
495 cities of Murcia and Girona with 12 and 11 months, respectively.

### Distribution of *pro pluvia* rogations

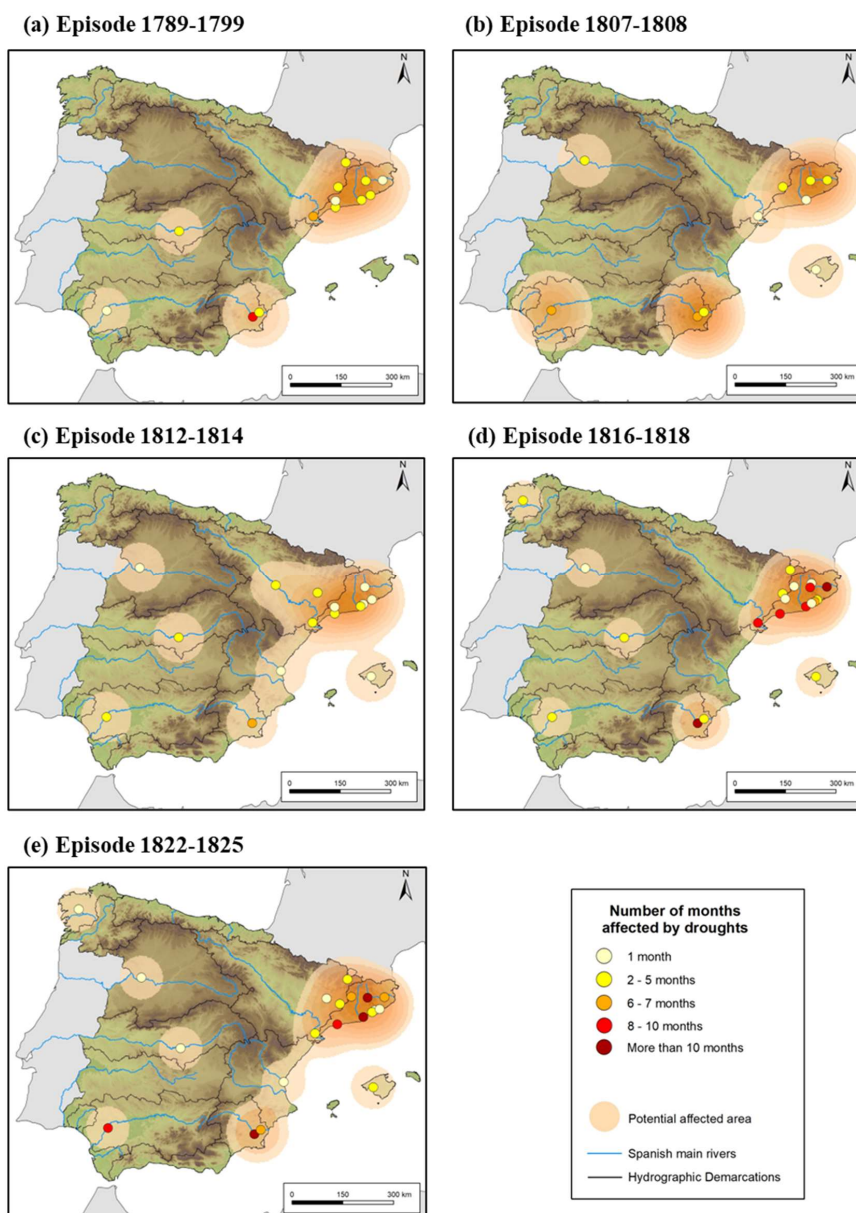

496  
497  
498  
499  
500

Figure 5: Distribution of *pro pluvia* rogations by municipality. (a) Drought episode of 1798-1799. (b) Drought episode of 1807-1808. (c) Drought episode of 1812-1814. (d) Drought episode of 1816-1818. (e) Drought episode of 1822-1825. Elaboration from AMARNA database using Arc Map GIS Software, applying Kernel Density Tool.

501





502           The last episode took place between January 1822 and January 1826 (Figure 5), although the  
503 year 1823 recorded a low number of rogations. This drought is noteworthy for being the longest and most  
504 persistent of the Early 19th Century (40 months). Three different peaks of severity can be observed:  
505 March 1822, April-May 1824 and February 1825. This drought affected eight very broadly distributed  
506 river basins: four Mediterranean basins (Catalan basins, Ebro, Balearic basins and Segura) and four  
507 Atlantic basins (Galician basins, Duero, Tagus and Guadalquivir). Also significant was the large  
508 accumulation of rogations carried out each month in the towns affected. For example, the town of Vic  
509 recorded twenty months of rogations, Murcia seventeen months and Barcelona, fifteen. This episode was  
510 accompanied by price increases of wheat and the emergence of a locust plague which affected different  
511 towns (Azcárate, 1996).

### 512 **3.3. Analysis of the instrumental precipitation data series of Barcelona (1786-2022)**

513           The analysis of the instrumental precipitation data series of Barcelona (1786-2022) was  
514 developed using three different drought indices (SPI, SPEI and Deciles) (Figure 6). The three drought  
515 indices reported a significant number of extreme drought events, both in severity and duration, during the  
516 Early 19th Century. A dry period between 1812 and 1825 stands out for its significant severity and  
517 duration. The three drought records also show values of relative abundant rainfall from the end of the  
518 19th Century until the end of the 20th Century. The beginning of the 21st Century reveals an upturn in the  
519 severity and duration of drought episodes with respect to the 20th Century. This dry period that continues  
520 to the present day appears to be less intense to those of the Early 19th Century, but may eventually  
521 become of similar duration and severity.

522           The SPI, in comparison with the behaviour of the other two indices, highlights more clearly the  
523 peaks of greater severity, both positive and negative (Figure 6). In this regard, 1817 stands out as the  
524 driest year in the precipitation data series, with months of maximum severity reaching values close to -4  
525 (-3.91 in the month of August) (Table 5). If we look at the results of this index, it becomes clear that after  
526 the Early 19th Century, during the 1830s, the years in drought conditions were prolonged, ending around  
527 1840. From the mid-19th Century, a new phase began with a low presence of prolonged dry periods until  
528 the end of the 20th Century. In the 21st Century, severe drought values can be observed again. For  
529 example, in 2021, a negative value of the SPI of close to -3 was recorded for the first time since the Early  
530 19th Century. The SPEI shows a different result to the other two indices as it combines rainfall and  
531 temperature values. In this respect, it is noteworthy that the most severe year of the series, according to  
532 the SPEI was not 1817 but 1822. It is possible that the negative thermal effect of the Tambora eruption  
533 (1815) was still significant in 1817, resulting in 1822 having a higher temperature and, consequently, a  
534 lower SPEI value. The 1870-1890 drought episode, which does not stand out so much in the other two  
535 indices, is also perceived as severe. With regard to the 20th Century, SPEI shows a phase of positive  
536 values that lasted twenty years from the 1970s to the 1990s with almost not a single month with negative  
537 values. In contrast, for the beginning of the 21st Century there are hardly any years with such positive  
538 values (Figure 6). Undoubtedly, the recent thermal warming increases the intensity of negative SPEI  
539 values and presents increased problems for water management.



540 The behaviour of the Deciles index is very similar to that obtained with the SPI index. This index  
541 softens the extreme positive and negative behaviours. Thus, the interpretation of rainfall abnormalities do  
542 not help, with only the most evident episodes being highlighted.

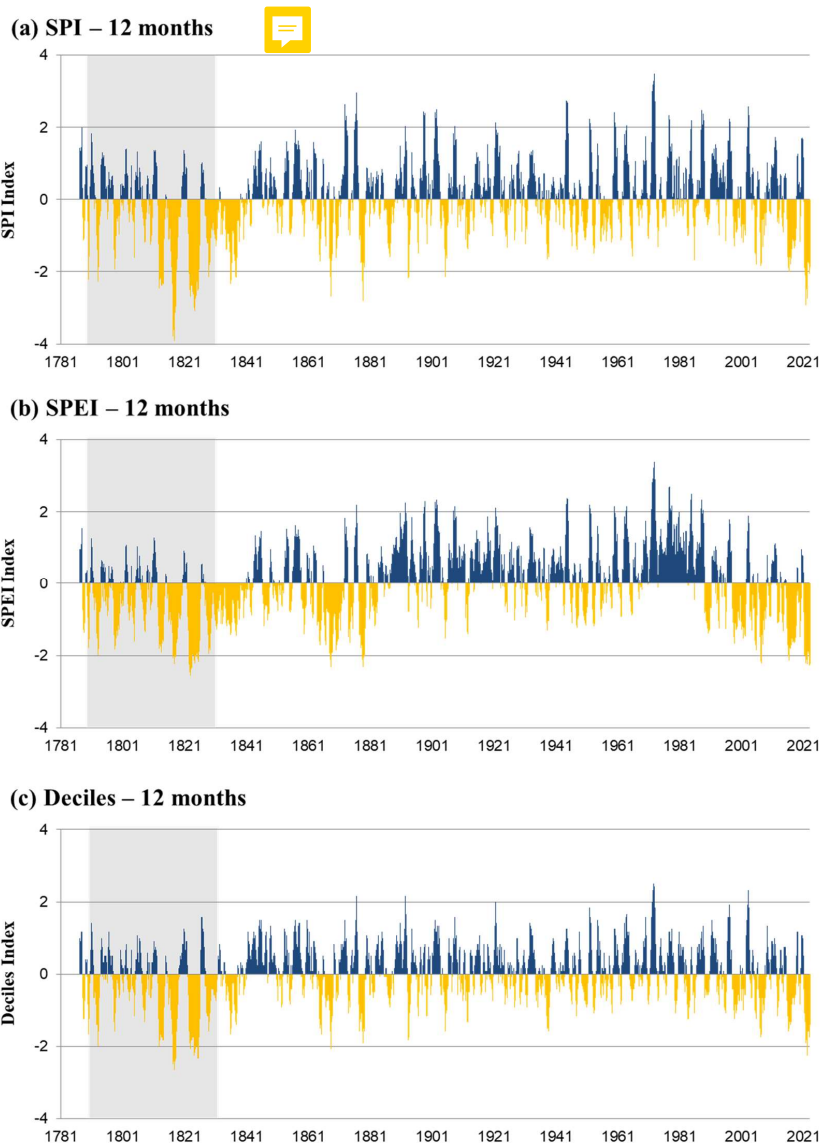

543 **Figure 6: Monthly values of the SPI, SPEI and Deciles indices for the Instrumental precipitation data series of**  
544 **Barcelona (1786-2022). The study period has been shaded in grey. Elaboration with the data obtained from**  
545 **Prohom et al., 2016.**  
546

547 The results obtained with the Pettitt Test are very similar for the SPI and Decile index values,  
548 although there are differences with respect to the SPEI index (Table 4). The main difference is the  
549 position of the first breakpoint which, for the case of the SPI and Deciles, occurred right at the end of the  
550 Early 19th Century, in the 1840s. On the other hand, for the SPEI index, this first breakpoint occurred at



551 the end of the nineteenth century, when a strong dry period ended that had lasted from 1860 to 1880 and  
 552 is much more important in this index than in the other two analysed. With respect to the breakpoint that  
 553 marks the end of the wet period of the twentieth century, the SPI and Deciles indices coincide with the  
 554 same period, at the end of 1997. Meanwhile, the SPEI marks it at the end of the 1980s, after the wet phase  
 555 of the 1970s and 1980s. From this point, the three indices go back to indicating negative averages for  
 556 their respective series (Table 4).

| Pettitt Test Results |                       |                    |                       |                    |                       |
|----------------------|-----------------------|--------------------|-----------------------|--------------------|-----------------------|
| Monthly data series  | 1st section's average | 1st breaking point | 2nd section's average | 2nd breaking point | 3rd section's average |
| <b>SPI</b>           | -0.48 (669 m: 56 yr)  | October 1842       | 0.21 (1862 m: 155 yr) | December 1997      | -0.22 (301 m: 25 yr)  |
| <b>SPEI</b>          | -0.43 (1157 m: 96 yr) | June 1883          | 0.56 (1266 m: 105 yr) | December 1988      | -0.52 (409 m: 34 yr)  |
| <b>Deciles</b>       | -0.34 (643 m: 54 yr)  | August 1840        | 0.15 (1886 m: 157 yr) | October 1997       | -0.25 (303 m: 25 yr)  |

557  
558  
559

Table 4: Results of the breakpoints according to the Pettitt Test for drought indices (SPI, SPEI and Deciles). Elaboration with the data obtained from Prohom et al., 2016.

560 Based on the values of the three indices, the drought episodes are summarised for the Barcelona  
 561 data series (Table 5). It reveals a greater number of drought episodes recorded in the 19th Century  
 562 compared to the 21st Century, in which the droughts were not only scarce but also less severe and shorter  
 563 (Figure 7). This can be confirmed if we consider that in the first twenty years of the 21st Century the  
 564 same number of droughts have been recorded as those occurring throughout the whole of the 20th  
 565 Century.

566 The droughts of the Early 19th Century period (Nr. 2 to 8) stand out due to their extreme  
 567 severity, particularly those in the central part of the period, when not only were the droughts severe but  
 568 also a large number of dry months were concentrated during this time (Table 5, Figure 7). For the rest of  
 569 the drought episodes of the series, we can observe that the majority had shorter duration (Figure 7). Only  
 570 three noteworthy drought episodes are outside of the Early 19th Century: 1877-1879 (Nr. 14), 2015-2018  
 571 (Nr. 23) and 2021-2022 (Nr. 24).

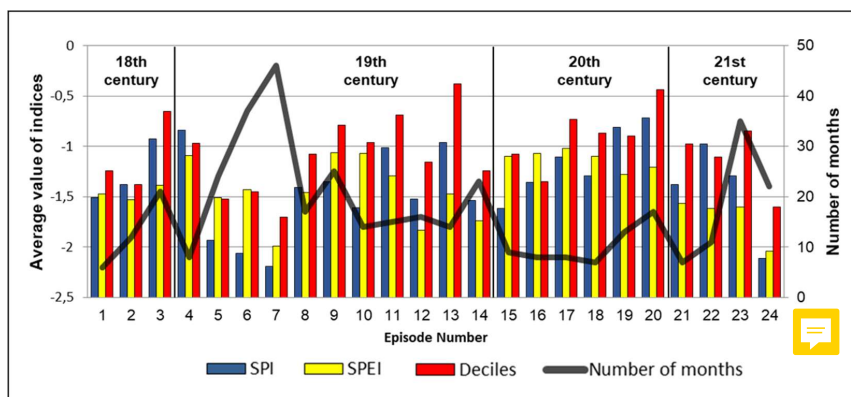

572  
573  
574

Figure 7: Representation of the mean values of the indices and the duration in months of the drought episodes described in Table 6. Elaboration with the data obtained from Prohom et al., 2016.



| Episode Num. | Date    |         | Month Num. * | Averages of index values for each episode |       |       | Minimum values of the episodes ** |       |       |         |
|--------------|---------|---------|--------------|-------------------------------------------|-------|-------|-----------------------------------|-------|-------|---------|
|              | Onset   | Ending  |              | SPI                                       | SPEI  | Dec.  | SPI                               | SPEI  | Dec.  | Month   |
| 1            | 1789/09 | 1790/03 | 6            | -1.34                                     | -1.47 | -1.24 | -2.22                             | -1.79 | -1.67 | 11/1789 |
| 2            | 1792/05 | 1793/04 | 12           | -1.38                                     | -1.53 | -1.38 | -2.29                             | -2.00 | -2.00 | 01/1793 |
| 3            | 1798/03 | 1798/12 | 10           | -1.36                                     | -1.59 | -1.02 | -1.94                             | -1.76 | -1.58 | 05/1798 |
| 4            | 1807/09 | 1808/04 | 8            | -0.84                                     | -1.09 | -0.97 | -1.19                             | -1.31 | -1.33 | 01/1808 |
| 5            | 1812/05 | 1814/05 | 25           | -1.88                                     | -1.47 | -1.49 | -2.46                             | -1.82 | -2.00 | 10/1812 |
| 6            | 1815/11 | 1818/11 | 37           | -2.06                                     | -1.43 | -1.45 | -3.91                             | -2.24 | -2.67 | 08/1817 |
| 7            | 1822/03 | 1825/11 | 45           | -2.23                                     | -2.02 | -1.75 | -3.10                             | -2.22 | -2.17 | 01/1824 |
| 8            | 1828/01 | 1829/05 | 17           | -1.41                                     | -1.46 | -1.08 | -2.14                             | -1.95 | -1.58 | 10/1828 |
| 9            | 1834/04 | 1836/04 | 25           | -1.35                                     | -1.06 | -0.78 | -2.35                             | -1.44 | -1.67 | 11/1835 |
| 10           | 1836/11 | 1837/12 | 14           | -1.61                                     | -1.07 | -0.96 | -2.17                             | -1.46 | -1.42 | 08/1837 |
| 11           | 1864/04 | 1864/11 | 8            | -1.34                                     | -1.51 | -1.11 | -1.71                             | -1.72 | -1.50 | 09/1864 |
| 12           | 1867/10 | 1868/10 | 13           | -1.74                                     | -1.94 | -1.27 | -2.69                             | -2.32 | -2.08 | 03/1868 |
| 13           | 1869/10 | 1870/07 | 10           | -1.18                                     | -1.60 | -0.48 | -1.62                             | -1.86 | -0.75 | 11/1869 |
| 14           | 1877/05 | 1879/01 | 21           | -1.64                                     | -1.78 | -1.33 | -2.80                             | -2.31 | -1.92 | 08/1978 |
| 15           | 1886/07 | 1887/08 | 14           | -1.13                                     | 0.05  | -0.57 | -1.60                             | -0.16 | -0.92 | 03/1887 |
| 16           | 1893/02 | 1893/10 | 9            | -1.44                                     | -0.19 | -1.22 | -2.19                             | -0.79 | -1.83 | 04/1893 |
| 17           | 1904/12 | 1905/10 | 11           | -1.47                                     | -0.99 | -0.99 | -2.15                             | -1.53 | -1.58 | 04/1905 |
| 18           | 1937/11 | 1938/08 | 10           | -1.26                                     | -0.98 | -1.27 | -1.65                             | 1.32  | -1.50 | 03/1938 |
| 19           | 1947/05 | 1948/01 | 9            | -1.07                                     | -1.01 | -0.67 | -1.40                             | -1.23 | -0.83 | 10/1947 |
| 20           | 1952/10 | 1953/05 | 8            | -1.22                                     | -1.05 | -0.8  | -1.49                             | -1.20 | -1.00 | 03/1953 |
| 21           | 1965/02 | 1965/09 | 8            | -1.23                                     | -0.76 | -0.52 | -1.58                             | -0.88 | -0.75 | 09/1965 |
| 22           | 2005/03 | 2005/09 | 7            | -1.38                                     | -1.57 | -0.98 | -1.79                             | -1.86 | -1.25 | 07/2005 |
| 23           | 2006/11 | 2007/04 | 6            | -1.28                                     | -1.84 | -1.46 | -1.84                             | -2.15 | -1.75 | 01/2007 |
| 24           | 2015/09 | 2018/07 | 35           | -1.29                                     | -1.60 | -0.85 | -2.00                             | -2.15 | -1.50 | 03/2016 |
| 25           | 2021/04 | 2022/12 | 21           | -2.11                                     | -2.04 | -1.6  | -2.92                             | -2.22 | -1.92 | 09/2021 |

575 **Table 5: Drought episodes in the instrumental precipitation data series of Barcelona (1786-2022).**

576 \*Number of months determined by the following criteria: Episodes must have at least 6 months below “-1”

577 value of SPI Index. The count of months will start and finish with the values below “-0.75”.

578 \*\*The month with the lowest value of each episode corresponds to the SPI index. Elaboration with the data

579 obtained from Prohom et al., 2016.

580 **4. DISCUSSION**

581 The comparison between the results obtained from the historical data and the instrumental data

582 set is part of the main objective of this study. This comparison makes it possible to contrast the reliability

583 of the methods used and to assess the consistency of the results obtained.

584 The combination of different *proxy* data expands the knowledge on the extreme

585 hydrometeorological events, whether they be excesses or deficits, occurring in the past. In this case, the

586 historical data and the instrumental data set of Barcelona have allowed us to analyse one of the driest

587 known periods in the study area (Table 6). The comparison of the standardised values of the historical

588 series with the instrumental indices enables us to observe the synchrony between the historical *proxy* and

589 the instrumental data (Figure 8). The coincidence of the duration of the episodes from the historical data

590 and instrumental sets is noteworthy. The only episode for which the durations are different is that of 1807,

591 attributable to the fact that it mainly affected and for longer the southern regions of the Iberian Peninsula.

592 In terms of the severity of the episodes, the coincidence between the two sets of data is also noteworthy,

593 with the episodes with most documented cases coinciding with those with a lower SPI index. The only

594 episode that does not follow this pattern is that of 1812, in which the number of negative ERE cases is

595 relatively low. But, on the other hand, according to the SPI, it is the episode with the third lowest mean of

596 the Early 19th Century (1790-1830). The use of elements related to the social vulnerability to drought and



597 extending the length of the data collection in different locations would help to resolve these specific  
 598 uncertainties and constitute lines of research to be developed in the future.

| Episod. Num. | Date according to historical data |         | Month Num. | Date according to instrumental data |         | Month Num. | Number of cases |          | SPI episode average |
|--------------|-----------------------------------|---------|------------|-------------------------------------|---------|------------|-----------------|----------|---------------------|
|              | Onset                             | Ending  |            | Onset                               | Ending  |            | ERE Pos.        | ERE Neg. |                     |
|              |                                   |         |            |                                     |         |            |                 |          |                     |
| 4            | 01/1807                           | 07/1808 | 19         | 09/1807                             | 04/1808 | 8          | 17              | 55       | -0.84               |
| 5            | 03/1812                           | 04/1814 | 21         | 05/1812                             | 04/1814 | 24         | 24              | 44       | -1.93               |
| 6            | 12/1815                           | 11/1818 | 37         | 11/1815                             | 11/1818 | 37         | 20              | 175      | -2.06               |
| 7            | 01/1822                           | 01/1826 | 40         | 01/1822                             | 10/1825 | 46         | 41              | 279      | -2.19               |

599 **Table 6: Characteristics of the five principal drought episodes of the Early 19th Century (1790-1830)**  
 600 **according to historical data and instrumental series. Elaboration with the data obtained from Prohom et al.,**  
 601 **2016 and the data from the AMARNA database.**

602 Figure 8 shows the coincidence of the droughts according to the historical data (positive values)  
 603 with the negative oscillations shown by the SPI and SPEI indices. The overlapping of this information  
 604 highlights the importance of the droughts in the final part of the Early 19th Century, specifically between  
 605 1815 and 1825, although the instrumental data indicate that this period could have started in 1812. For  
 606 this reason, it is desirable to analyse in more detail the three drought episodes in which there is a high  
 607 degree of alignment between the instrumental data the historical proxy data:

- 608 - That of 1798 stands out as it forms part of the rainfall irregularity typical of the Maldà  
 609 Oscillation (Barriendos & Llasat, 2003). This drought occurred between two phases of  
 610 intense rainfall. The alternation of floods or heavy rains with droughts is typical in areas  
 611 with Mediterranean climate. Despite this fact, this is the only drought of the Early 19th  
 612 Century which precedes and is preceded by flood or heavy rains episodes in the Northeast  
 613 Iberian Peninsula.
- 614 - The drought of 1817 was different as it was the most severe according to the SPI index and  
 615 was the year during which the most drought cases were recorded in the whole of the Early  
 616 19th Century (120). Despite this strong impact, mainly corresponding to the first half of  
 617 1817, the episode was not as long as that of 1822-1825 and, for this reason, according to the  
 618 SPEI index, it was less severe than this latter episode.
- 619 - That of 1822-1825 stands out for its duration of around 40 months according to the  
 620 rogations and 46 months according to the instrumental series. This not only makes it the  
 621 longest episode of the Early 19th Century but also of the whole of the precipitation series of  
 622 Barcelona (Table 6). Moreover, this episode is the one with the highest severity, both in  
 623 terms of the accumulation of drought cases (279) and in terms of the SPI average for the  
 624 episode as a whole. It is also worth mentioning that according to the SPEI index, this  
 625 episode is the most severe of the entire Barcelona rainfall data series.

626 Based on the standardised data series of the number of droughts for the Early 19th Century, the  
 627 correlation coefficient has been calculated with the values of the different drought indices, with which the  
 628 precipitation sets of Barcelona have been analysed (Table 7). We can observe that the values of the three  
 629 indices generate correlations of over -0.5; where the Deciles index has the greatest correlation value,  
 630 which is inverted (-0.65). The same is confirmed for the coefficients of determination: it verifies that



631 between 35% and 42% of the variability is explained by the behaviour of the variables used (drought  
632 indices vs. number of drought cases).

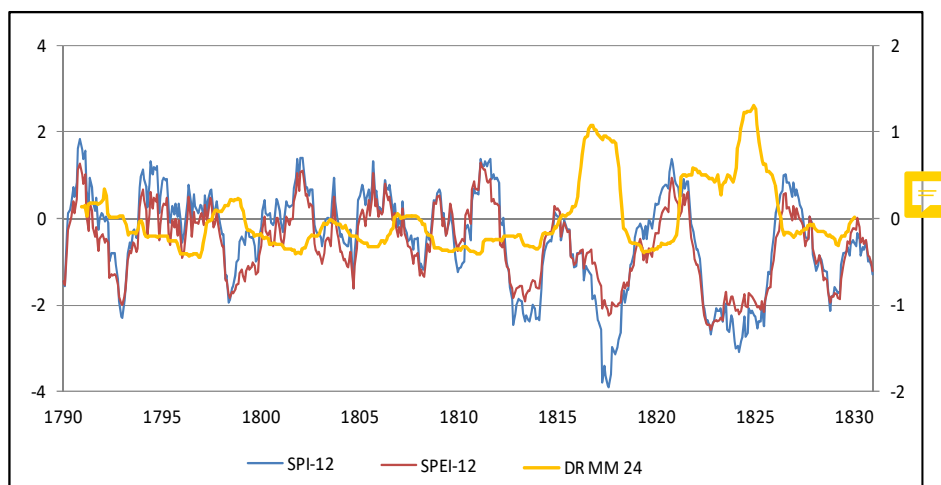

633  
634  
635  
636

**Figure 8:** Comparison of the results of the drought indices (SPI and SPEI) and the two-year moving average of the standardised monthly values of the drought cases (DR). Elaboration with the data obtained from Prohom et al., 2016 and the data from the AMARNA database.

| Index   | Correlation coefficient (R) | Correlation coefficient (R <sup>2</sup> ) |
|---------|-----------------------------|-------------------------------------------|
| SPI     | -0.62                       | 0.38                                      |
| SPEI    | -0.59                       | 0.35                                      |
| Deciles | -0.65                       | 0.42                                      |

637

**Table 7:** Correlation and determination coefficients.

638 The study of extreme drought episodes in the past is important for understanding the pattern of  
639 low frequency episodes and for addressing the droughts occurring in the context of climate change, which  
640 have erratic behaviour according to the most recent models (IPCC, 2021). Furthermore, the knowledge  
641 generated for the study over a long period of time also enables us to better understand the vulnerability of  
642 society in different historical contexts and the way in which it has adapted over time to droughts.

643 Different studies carried out on droughts for the whole of the Mediterranean region for long time  
644 periods (Kim & Raible, 2021; Xoplaki, et al., 2018; Marcos-García, et al., 2017) reveal that it is one of  
645 the most vulnerable regions to this natural risk within the context of global warming. Taking into account  
646 the results of this paper, the importance of droughts in the Mediterranean region are underlined, it is  
647 necessary to have the support of different drought indices, as well as other climatic indicators to  
648 determine their severity (Kim & Raible, 2021). The availability of older instrumental data series is highly  
649 important to find a wider range of drought severities and typologies than those found only by analysing  
650 the 20th Century. This relationship is evidenced in the research carried out by Erfurt et al., 2020 that  
651 combines historical instrumental data with dendrochronological records to analyse the period of the  
652 beginning of the 19th Century in south-east Germany. With respect to the use of dendrochronological  
653 data to analyse the droughts and megadroughts of the past, the Old-World Drought Atlas is also worth  
654 mentioning (Cook et al., 2015). This publication includes a severe drought that occurred at the beginning  
655 of the 19th Century, between the Little Ice Age and the Modern Climate period.



656 Other authors, particularly in the study of the Iberian Peninsula, have used historical data for  
657 classifying droughts in the period at the beginning of the nineteenth century (Dominguez-Castro et al.,  
658 2012; Gil-Guirado et al., 2019; Gil-Guirado & Pérez-Morales, 2019). It is worth highlighting the article  
659 by Domínguez-Castro et al., 2012, in which the historical data is combined with instrumental data to  
660 characterise the droughts of the period analysed in Spain. In this case, the same dry periods of great  
661 intensity are detected (1817 and 1824) by both the historical and the instrumental data series. The authors  
662 conclude that the relationship between these droughts and external forcing factors is clear, but more  
663 research is also required to confirm it.

664 Furthermore, the modelling used by (Kim & Raible, 2021) does not show any extraordinary  
665 occurrence of droughts for the Mediterranean region as a whole during the Early 19th Century. Neither do  
666 these authors relate rainfall patterns with that of those volcanic eruptions emitting more particles into the  
667 lower stratosphere, such as Tambora. According to their study, droughts occurring in the Mediterranean  
668 are due mainly to the internal dynamics of the climate system and not to external forcing factors (inter-  
669 tropical volcanic eruptions and solar radiation variations) (Kim & Raible, 2021). The same conclusion has  
670 been obtained for the Eastern Mediterranean region, although for another period than the one studied in  
671 this research (Xoplaki, et al., 2018). For these reasons, it may be concluded that the relationship between  
672 the external forcing factors can lead to different rainfall patterns depending on the region in which specific  
673 conditions prevail.

674 In the case of the Iberian Peninsula, the combination of inter-tropical volcanic eruptions with  
675 positive phases of the North Atlantic Oscillation during the first two years after the eruption could result  
676 in dry periods for the Iberian Peninsula and in wet phases for Central Europe (Dominguez-Castro et al.,  
677 2012). To that, the lack of droughts detected in south-east Germany during the Early 19th Century could  
678 reinforce this hypothesis (Erfurt et al., 2020). In this study of droughts for south-east Germany, despite  
679 the lack of droughts in the Early 19th Century, there were temporal coincidences with other severe  
680 drought episodes, such as those occurring at the end of the 19th Century (between 1857 and 1870) and at  
681 the beginning of the 21st Century (2003 to 2018) (Erfurt et al., 2020). This period coincides with two of  
682 the most severe episodes of this century according to the records of the instrumental precipitation data  
683 series of Barcelona: the drought of 2007-2008 and that of 2015-2018 (see Table 5).

## 684 5. CONCLUSIONS

685 The results obtained with this broad time-scale research contribute to a better understanding of  
686 drought episodes occurring in the early 21st Century in the study area. Data collection and extension of  
687 databases, allows a substantial improvement of knowledge about drought patterns in the study area.

688 One of the main results achieved in this research is the high negative correlation between the  
689 drought historical data and the instrumental precipitation data sets of Barcelona. This correlation validates  
690 the historical information for the study of climate droughts in historical perspective. Despite their  
691 different origins and methodologies, these two data sources have shown that they can provide information  
692 that is comparable, enabling the reinforcement of the importance of the episode recorded, either floods or  
693 droughts.



694 The combined use of instrumental and historical sources shows changes in rainfall variability in  
695 specific periods, alternating between periods of heavy rainfall and drought. Accordingly, in the Spanish  
696 Mediterranean basins during the Early 19th Century, between 1810 and 1830, the alternation between  
697 periods of heavy rainfall and drought is revealed. In contrast, rainfall patterns during the preceding  
698 climatic phase of the Maldá Oscillation (1760-1800) were directly opposite to those observed during the  
699 Early 19th Century. Additionally, the analysis of instrumental data shows the similar pattern of severe  
700 droughts between the end of the LIA and the current context of Global Warming. On the other hand, the  
701 20th Century does not show such a pattern of severe droughts.

702 The integration of historical documentary sources with instrumental records for identifying  
703 severe droughts has yielded promising outcomes. This methodology, leveraging documentary evidence,  
704 has been proven viable for periods or regions lacking instrumental data. Building on the success of  
705 merging these two climatic information sources, a prospective research direction for the Early 19th  
706 Century and other significant climatic epochs involves amalgamating historical data with evidence from  
707 other climatic proxies, particularly dendrochronology, alongside instrumental pressure series. Such an  
708 approach would enhance our comprehension of the atmospheric processes at a synoptic scale, elucidating  
709 the mechanisms behind the most severe drought episodes.

## 710 6. REFERENCES

- 711 AEMET e Instituto de Meteorología de Portugal.: Atlas Climático Ibérico, Madrid, 79 pp. 2011.  
712 [https://www.aemet.es/documentos/es/conocerlas/recursos\\_en\\_linea/publicaciones\\_y\\_estudios/publicaciones/Atlas-climatologico/Atlas.pdf](https://www.aemet.es/documentos/es/conocerlas/recursos_en_linea/publicaciones_y_estudios/publicaciones/Atlas-climatologico/Atlas.pdf)  
713  
714 Alberola, A.: El clima «trastornat»: sequera, temporals, riuades i inundacions a Catalunya i al País  
715 Valencià a les acaballes del segle XVIII. *Estudis d'història Agrària*, 23(23), 301–317.  
716 <http://www.raco.cat/index.php/EHA/article/view/259564>, 2010.  
717 Alberola, A. and Arrijoja, L.: Clima, medio ambiente y plagas de langosta en la Península Ibérica y  
718 América Central en el último tercio del siglo XVIII. Una aproximación comparativa. *Anuario de Estudios*  
719 *Atlánticos*, 65(065–011), 1–23. 2018.  
720 Azcárate, I. (Ed): *Plagas agrícolas y forestales en España (s. XVIII-XIX)*. Serie Estudios, nº 131.  
721 Ministerio de Agricultura, Pesca y Alimentación, Madrid, Spain, 439 pp., ISBN: 84-491-0270-7, 1996  
722 Barrera-Escoda, A. and Cunillera, J.: Primer informe sobre la generació d'escenaris climàtics  
723 regionalitzats per a Catalunya durant el segle XXI. Equip de Canvi Climàtic de l'Àrea de Climatologia  
724 del Servei Meteorològic de Catalunya, Departament de Territori i Sostenibilitat, Generalitat de Catalunya,  
725 Barcelona, Spain, 95 pp. 2011.  
726 Barriendos, M.: El clima histórico de Catalunya. Aproximación a sus características generales (ss. XV-  
727 XIX), Ph.D. thesis, Department of Physical Geography, University of Barcelona, Spain, 499 pp., 1994.  
728 Barriendos, M.: El clima histórico de Catalunya (siglos XIV-XIX). Fuentes, métodos y primeros  
729 resultados. *Revista de Geografía*, 30–31, 69–96. 1996.  
730 Barriendos, M.: Climatic variations in the Iberian Peninsula during the late Maunder minimum (AD  
731 1675-1715): An analysis of data from rogation ceremonies. *The Holocene*, 7(1), 105–111.  
732 <https://doi.org/10.1177/095968369700700110>, 1997.





- 733 Barriendos, M.: Variabilidad climática y riesgos climáticos en perspectiva histórica. El caso de Catalunya  
734 en los siglos XVIII-XIX. *Revista de Historia Moderna.*, 23, 11–34. 2005.
- 735 Barriendos, M. and Barriendos, J.: Los inicios de la Pequeña Edad del Hielo en España. Aportaciones de  
736 la climatología histórica al clima del siglo XIV. *Geographica*, 73, 55–79.  
737 [https://doi.org/10.26754/ojs\\_geoph/02108380](https://doi.org/10.26754/ojs_geoph/02108380), 2021.
- 738 Barriendos, M. and Llasat, M. C.: The case of the “Maldá” anomaly in the Western Mediterranean basin  
739 (AD 1760-1800): An example of a strong climatic variability. *Climatic Change*, 61(1–2), 191–216.  
740 <https://doi.org/10.1023/A:1026327613698>, 2003.
- 741 Barriendos, M. and Martín-Vide, J.: Secular climatic oscillations as indicated by catastrophic floods in the  
742 Spanish Mediterranean coastal area (14th-19th centuries). *Climatic Change*, 38(4), 473–491.  
743 <https://doi.org/10.1023/A:1005343828552>, 1998.
- 744 Barriendos, M. and Sánchez Rodrigo, F.: Study of historical flood events on Spanish rivers using  
745 documentary data. *Hydrolog. Sci. J.*, 51(5), 765–783. <https://doi.org/10.1623/hysj.51.5.765>, 2006.
- 746 Barriendos, M., Gil-Guirado, S., Pino, D., Tuset, J., Pérez-Morales, A., Alberola, A., Costa, J., Balasch, J.  
747 C., Castellort, X., Mazón, J., and Ruiz-Bellet, J. L.: Climatic and social factors behind the Spanish  
748 Mediterranean flood event chronologies from documentary sources (14th–20th centuries). *Global Planet  
749 Change*, 182, 102997, <https://doi.org/10.1016/j.gloplacha.2019.102997>, 2019.
- 750 Bentabol, H.: *Las aguas de España y Portugal*. Vda. e Hijos de M. Tello, 2<sup>nd</sup> edition, 1900. Reissue El  
751 Viso, Madrid, Spain, 347 pp. 1900.
- 752 Bravo-Paredes, N., Gallego, M. C., Domínguez-Castro, F., García, J. A., Vaquero, J. M.: Pro-pluvia  
753 rogation ceremonies in Extremadura (Spain): Are they a good proxy of winter NAO? *Atmosphere*, 11(3),  
754 282, <https://doi.org/10.3390/atmos11030282>, 2020.
- 755 Brázdil, R., Kiss, A., Luterbacher, J., Nash, D. J., and Řezníčková, L.: Documentary Data and the Study  
756 of Past Droughts: A Global State of the Art. *Clim Past*, 14, no. 12, 1915–60. [https://doi.org/10.5194/cp-  
757 14-1915-2018](https://doi.org/10.5194/cp-14-1915-2018), 2018.
- 758 Brázdil, R., Demarée, G. R., Kiss, A., Dobrovolný, P., Chromá, K., Trnka, M., Dolák, L., Rezníčková, L.,  
759 Zahradnické, P., Limanowka, D., and Jourdain, S.: The extreme drought of 1842 in Europe as described  
760 by both documentary data and instrumental measurements, *Clim. Past.*, 15, 1861-1884.  
761 <https://doi.org/10.5194/cp-15-1861-2019>, 2019.
- 762 Brönnimann, S., White, S., and Slonosky, V.: Climate from 1800 to 1970 in North America and Europe,  
763 in: *The Palgrave Handbook of Climate History*, edited by: White, S., Pfister, C., and Mauelshagen, F.,  
764 Palgrave Macmillan, London, United Kingdom, 309–320, [https://doi.org/10.1057/978-1-137-43020-5\\_25](https://doi.org/10.1057/978-1-137-43020-5_25),  
765 2018.
- 766 Brönnimann, S., Pfister, C., and White, S.: Archives of Nature and Archives of Societies, in: *The  
767 Palgrave Handbook of Climate History*, edited by: White, S., Pfister, C., and Mauelshagen, F., Palgrave  
768 Macmillan, London, United Kingdom, 27–35, [https://doi.org/10.1057/978-1-137-43020-5\\_3](https://doi.org/10.1057/978-1-137-43020-5_3), 2018.
- 769 Camuffo, D., Bertolin, C., Diodato, N., Cocheo, C., Barriendos, M., Domínguez-Castro, F., Garnier, E.,  
770 Alcoforado, M.J., and Nunes, M.F.: Western Mediterranean precipitation over the last 300 years from  
771 instrumental observations, *Climatic Change*, 117, 85-101. <https://doi.org/10.1007/s10584-012-0539-9>,  
772 2013.



- 773 Cook, E. R., Seager, R., Kushnir, Y., Briffa, K. R., Büntgen, U., Frank, D., Krusic, P. J., Tegel, W., Van  
774 der Schrier, G., Andreu-Hayles, L., Baillie, M., Baittinger, C., Bleicher, N., Bonde, N., Brown, D., Carrer,  
775 M., Cooper, R., Čufar, K., Dittmar, C., Esper, J., Griggs, C., Gunnarson, B., Günther, B., Gutierrez, E.,  
776 Haneca, K., Helama, S., Herzig, F., Heussner, K. U., Hofmann, J., Janda, J., Kontic, R., Köse, N., Kyncl,  
777 T., Levanič, T., Linderholm, H., Manning, S., Melvin, T. M., Miles, D., Neuwirth, B., Nicolussi, K.,  
778 Nola, P., Panayotov, M., Popa, I., Rothe, A., Seftigen, K., Seim, A., Svarva, H., Svoboda, M., Thun, T.,  
779 Timonen, M., Touchan, R., Trotsiuk, V., Trouet, V., Walder, F., Ważny, T., Wilson, R., and Zang, C.:  
780 Old World megadroughts and pluvials during the Common Era, *Science advances*, 1(10), e1500561. DOI:  
781 10.1126/sciadv.1500561, 2015.
- 782 Couchoud, R.: *Hidrología histórica del Segura, Efemérides hidrológica y fervorosa recopilada y escrita*  
783 *por el Dr. R. Couchoud*, Centro de Estudios Hidrográficos, Madrid, Spain, 104 pp., DL: M-8457-1965,  
784 1965.
- 785 Cuadrat, J.M., Alfaro Pérez, F.J., Tejedor Vargas, E., Barriendos, M., and Serrano-Notivolí, R.: La  
786 megasecada de 1626-1635 i els seus impactes a la vall mitjana de l'Ebre (Espanya), *Estudis d'Història*  
787 *Agrària*, 34: 163-183, <https://doi.org/10.1344/eha.2022.34.163-183>, 2022.
- 788 Domínguez-Castro, F., Santisteban, J. I., Barriendos, M., and Mediavilla, R.: Reconstruction of seasonal  
789 and annual rainfall variability in the Iberian Peninsula (16th-20th Centuries) from documentary data,  
790 *Global Planet Change*, 63(2–3), 230–242, <https://doi.org/10.1016/j.gloplacha.2008.06.002>, 2008.
- 791 Domínguez-Castro, F., Ribera, P., García-Herrera, R., Vaquero, J. M., Barriendos, M., Cuadrat, J. M., and  
792 Moreno, J. M.: Assessing extreme droughts in Spain during 1750-1850 from rogation ceremonies, *Clim.*  
793 *Past.*, 8(2), 705–722, <https://doi.org/10.5194/cp-8-705-2012>, 2012.
- 794 Domínguez-Castro, F., Alcoforado, M. J., Bravo-Paredes, N., Fernández-Fernández, M. I., Frago, M.,  
795 Gallego, M. C., García Herrera, R., Garnier, E., Garza-Merodio, G., El Kenawy, A. M., Latorre, B.,  
796 Noguera, I., Peña-Angulo, D., Reig-Gracia, F., Silva, L. P., Vaquero, J. M., and Vicente Serrano, S. M.:  
797 Dating historical droughts from religious ceremonies, the international pro pluvia rogation database.  
798 *Scientific Data*, 8(1), 186, <https://doi.org/10.1038/s41597-021-00952-5>, 2021. Erfurt, M., Skiadareisis, G.,  
799 Tjeldeman, E., Blauhut, V., Bauhus, J., Glaser, R., Schwarz, J., Tegel, W., and Stahl, K.: A  
800 multidisciplinary drought catalogue for southwestern Germany dating back to 1801, *Nat. Hazard. Earth*  
801 *Sys.*, 20(11), 2979–2995, <https://doi.org/10.5194/nhess-20-2979-2020>, 2020.
- 802 Eslamian, S., Ostad-ali-askari, K., Singh, V. P., and Dalezios, N. R.: A Review of Drought Indices, *Int. J.*  
803 *Civ. Eng.*, 3(4), 48–66, <https://doi.org/10.20431/2454-8693.0304005>, 2017.
- 804 Fang, S.-W., Sigl, M., Toohey, M., Jungclauss, J., Zanchettin, D., and Timmreck, C.: The role of small to  
805 moderate volcanic eruptions in the early 19th century climate. *Geophysical Research Letters*, 50,  
806 e2023GL105307, <https://doi.org/10.1029/2023GL105307>, 2023.
- 807 Fischer, E., Luterbacher, J., Zorita, E., Tett, S., Casty, C., and Wanner, H.: European climate response to  
808 tropical volcanic eruptions over the last half millennium. *Geophys. Res. Lett.*,  
809 <https://doi.org/10.1029/2006GL027992>, 2007.
- 810 Frago, M., Carraça, M. D. G., and Alcoforado, M. J.: Droughts in Portugal in the 18th century: A study  
811 based on newly found documentary data. *Int. J. Climatol.* 38, 5522, <https://doi.org/10.1002/joc.5745>,  
812 2018.

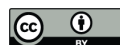

- 813 Garnier, E.: Historic Drought from archives: Beyond the Instrumental Record, in: Drought Science and  
814 Policy, edited by Iglesias, A., Assimacopoulos, D., and Van Lanen, H. A. J., Wiley-Blackwell, 45–67,  
815 2019.
- 816 Garza-Merodio, G. G.: Variabilidad climática en México a través de fuentes documentales (siglos XVI al  
817 XIX). Instituto de Geografía, Universidad Nacional Autónoma de México (UNAM), 2017.
- 818 Gibbs, W. J. and Maher, J. V.: Rainfall Deciles as Drought Indicators. Bureau of Meteorology Bull. 48,  
819 Commonwealth of Australia, Melbourne, Australia, 1967.
- 820 Gil-Guirado, S.: Reconstrucción climática histórica y análisis evolutivo de la vulnerabilidad y adaptación  
821 a las sequías e inundaciones en la Cuenca del Segura (España) y en la cuenca del Río Mendoza  
822 (Argentina), Ph.D. thesis, Department of Geography of the University of Murcia, Spain, 749 pp., 2013.
- 823 Gil-Guirado, S. and Pérez-Morales, A.: Climatic variability and temperature and rainfall patterns in  
824 Murcia (1863-2017). Climate analysis techniques in the context of global change. *Investigaciones*  
825 *Geograficas*, 71, 27–54. <https://doi.org/10.14198/INGEO2019.71.02>, 2019.
- 826 Gil-Guirado, S., Espín-Sánchez, J. A., and Prieto, M.: Can we learn from the past? Four hundred years of  
827 changes in adaptation to floods and droughts. Measuring the vulnerability in two Hispanic cities, *Climatic*  
828 *Change*, 139, 183-200, <https://doi.org/10.1007/s10584-016-1768-0>, 2016.
- 829 Gil-Guirado, S., Gómez-Navarro, J. J., and Montávez, J. P.: The weather behind words—new  
830 methodologies for integrated hydrometeorological reconstruction through documentary sources, *Clim.*  
831 *Past.*, 15(4), 1303-1325, <https://doi.org/10.5194/cp-15-1303-2019>, 2019.
- 832 Gil-Guirado, S., Olcina-Cantos, J., and Pérez-Morales, A.: The blessing of the “year without summer”:  
833 Climatic and socioeconomic impact of the Krakatoa eruption (1883) in the south-east of the Iberian  
834 Peninsula, *Int. J. Climatol.*, 41, 2279 - 2300, <https://doi.org/10.1002/joc.6958>, 2021.
- 835 González-Hidalgo, J. C., Vicente-Serrano, S. M., Peña-Angulo, D., Salinas, C., Tomas-Burguera, M., and  
836 Beguería, S.: High-resolution spatio-temporal analyses of drought episodes in the western Mediterranean  
837 basin (Spanish mainland, Iberian Peninsula). *Acta Geophys.*, 66, 381-392,  
838 <https://doi.org/10.1007/s11600-018-0138-x>, 2018.
- 839 Gorostiza, S., Martí Escayol, M. A., and Barriendos, M.: Human response to severe drought in Early  
840 Modern Catalonia. The case of Barcelona, Western Mediterranean (1620-1650). *Clim Past*, 17(2), 913-  
841 927, <https://doi.org/10.5194/cp-2020-33>, 2021.
- 842 Global Volcanism Program. Volcanoes of the World (v. 5.1.5; 15 Dec 2023). Distributed by Smithsonian  
843 Institution, compiled by Venzke, E. <https://doi.org/10.5479/si.GVP.VOTW5-2023.5.1>, 2023.
- 844 Grove, J. M.: The Little Ice Age, Routledge, ISBN 0-415-01449-2, 1988.
- 845 Hohenthal, J., and Minoia, P.: Social aspects of water scarcity and drought, in: Handbook of Drought and  
846 Water Scarcity: Principles of Drought and Water Scarcity, edited by: Eslamian, S. and Eslamian, F. A.,  
847 CRC Press, Boca Raton, FL, USA, 607-626, <https://doi.org/10.1201/9781315404219>, 2017.
- 848 IDMP.: Drought and water Scarcity, WMO No. 1284, Global Water Partnership, Stockholm, Sweden and  
849 World Meteorological Organization, Geneva, Switzerland, ISBN 978-92-63-11284-2, 2022.
- 850 IPCC: Annex II: Glossary, edited by Möller, V., Van Diemen, R., Matthews, J.B.R., Méndez, C.,  
851 Semenov, S., Fuglestedt, J.S., Reisinger, A. In: Climate Change 2022: Impacts, Adaptation and  
852 Vulnerability. Contribution of Working Group II to the Sixth Assessment Report of the

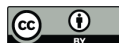

- 853 Intergovernmental Panel on Climate Change, edited by H.-O. Pörtner, Roberts, D.C., Tignor, M.,  
854 Poloczanska, E.S., Mintenbeck, K., Alegria, A., Craig, M., Langsdorf, S., Lösschke, S., Möller, V., Okem,  
855 A., Rama, B. Cambridge University Press, Cambridge, UK and New York, NY, USA, pp. 2897–2930,  
856 doi:10.1017/9781009325844.029, 2022.
- 857 Kim, W. and Raible, C. C.: Dynamics of the Mediterranean droughts from 850 to 2099 CE in the  
858 Community Earth System Model, *Clim. Past.*, 17(2), 887–911, <https://doi.org/10.5194/cp-17-887-2021>,  
859 2021.
- 860 Lee, D. S. and MacKenzie, A. R.: Trans-hemispheric effects of large volcanic eruptions as recorded by an  
861 early 19th century diary, *Int. J. Climatol.*, 30(14), 2217–2228, <https://doi.org/10.1002/joc.2034>, 2010.
- 862 Lloyd-Hughes, B. and Saunders, M. A.: A drought climatology for Europe. *Int. J. Climatol.*, 22(13),  
863 1571–1592, <https://doi.org/10.1002/joc.846>, 2002.
- 864 Luterbacher, J., and Pfister, C.: The year without a summer. *Nature Geosci.*, 8, 246–248, 2015.
- 865 Marcos-Garcia, P., Lopez-Nicolas, A., and Pulido-Velazquez, M.: Combined use of relative drought  
866 indices to analyze climate change impact on meteorological and hydrological droughts in a Mediterranean  
867 basin, *J. Hydrol.*, 554, 292–305, <https://doi.org/10.1016/j.jhydrol.2017.09.028>, 2017.
- 868 Martín-Vide, J.: *Pluges i inundacions a la Mediterrània*, Ketres Editora, Barcelona, Spain, 132 pp., ISBN  
869 84-85256-44-1, 1985.
- 870 Martín-Vide, J. and Barriendos, M.: The use of rogation ceremony records in climatic reconstruction: a  
871 case study from Catalonia (Spain), *Climatic Change*, 30(2), 201–221,  
872 <https://doi.org/10.1007/BF01091842>, 1995.
- 873 Martín-Vide, J. and Olcina Cantos, J.: *Climas y tiempos de España*, Alianza Editorial, Madrid, Spain, 176  
874 pp., ISBN 84-206-5777-8, 2001.
- 875 Masson-Delmotte, V., Zhai, P., Pirani, A., Connors, S. L., Péan, C., Berger, S., Caud, N., Chen, Y.,  
876 Goldfarb, L., Gomis, M.I., Huang, M., Leitzell, K., Lonnoy, E., Matthews, J.B.R., Maycock, T.K.,  
877 Waterfield, T., Yelekçi, O., Yu, R., and Zhou, B.: *Climate Change 2021: The Physical Science Basis*.  
878 Contribution of Working Group I to the Sixth Assessment Report of the Intergovernmental Panel on  
879 Climate Change, Cambridge University Press, Cambridge, United Kingdom and New York, NY, USA,  
880 2391 pp., doi:10.1017/9781009157896, 2021.
- 881 Mathbout, S., Lopez-Bustins, J., Royé, D., Martín-Vide, J., and Benhamrouche, A.: Spatiotemporal  
882 variability of daily precipitation concentration and its relationship to teleconnection patterns over the  
883 Mediterranean during 1975–2015. *International Journal of Climatology*. 40. 1435–1455.  
884 <https://doi.org/10.1002/joc.6278>, 2020.
- 885 McKee, T. B., Doesken, N. J., and Kleist, J.: The relationship of drought frequency and duration to time  
886 scales. *Proceedings of the 8th Conference on Applied Climatology*, 17(22), 179–183, 1993.
- 887 Mishra, A. K., & Singh, V. P.: A review of drought concepts. *J Hydrol*, 391(1–2), 202–216,  
888 <https://doi.org/10.1016/j.jhydrol.2010.07.012>, 2010.
- 889 MITECO – Ministerio para la Transición Ecológica y el Reto Demográfico. Cuencas y subcuencas  
890 hidrográficas: [https://www.miteco.gob.es/en/cartografia-y-sig/ide/descargas/agua/cuencas-y-](https://www.miteco.gob.es/en/cartografia-y-sig/ide/descargas/agua/cuencas-y-subcuencas.aspx)  
891 [subcuencas.aspx](https://www.miteco.gob.es/en/cartografia-y-sig/ide/descargas/agua/cuencas-y-subcuencas.aspx), last access: 5 June 2023.



- 892 Moruno, C.: La sequera de 1817 a Catalunya. Abast i conseqüències socials en un context de postguerra.  
893 Estudis d'història Agrària, 32(32), 97–113. <https://doi.org/10.1344/cha.2020.32.97-113>, 2021.
- 894 Nalbantis, I.: Evaluation of a Hydrological Drought Index. *European Water*, 2324, 67–77, 2008.
- 895 Olcina, J.: Tipología de sequías en España, *Ería*, 56, 201–227, 2001.
- 896 Olcina, J.: Causas de las sequías en España. Aspectos climáticos y geográficos de un fenómeno natural,  
897 in: *Causas y consecuencias de las sequías en España*, edited by: Gil Olcina, A. and Morales Gil, A.,  
898 Gráficas Antar, S.L., Alicante, Spain, 49–110, ISBN 84-7908-600-9, 2001.
- 899 Oliva, M., Ruiz-Fernández, J., Barriendos, M., Benito, G., Cuadrat, J. M., Domínguez-Castro, F., García-  
900 Ruiz, J. M., Giralt, S., Gómez-Ortiz, A., Hernández, A., López-Costas, O., López-Moreno, J. I., López-  
901 Sáez, J. A., Martínez-Cortizas, A., Moreno, A., Prohom, M., Saz, M. A., Serrano, E., Tejedor, E., Trigo,  
902 R., Valero-Garcés, B., and Vicente-Serrano, S. M.: The Little Ice Age in Iberian mountains. *Earth-Sci.*  
903 *Rev.*, 177, 175–208, <https://doi.org/10.1016/j.earscirev.2017.11.010>, 2018.
- 904 Pauling, A., Luterbacher, J., Casty, C., and Wanner, H.: Five hundred years of gridded high-resolution  
905 precipitation reconstructions over Europe and the connection to large-scale circulation. *Clim. Dynam.* 26,  
906 387–405, <https://doi.org/10.1007/s00382-005-0090-8>, 2006.
- 907 Pfister, C.: Evidence from the Archives of Societies: Institutional Sources, in: *The Palgrave Handbook of*  
908 *Climate History*, edited by: White, S., Pfister, C., and Mauelshagen, F., Palgrave Macmillan, London,  
909 United Kingdom, 67–81, [https://doi.org/10.1057/978-1-137-43020-5\\_6](https://doi.org/10.1057/978-1-137-43020-5_6), 2018.
- 910 Pfister, C. and White, S.: A Year Without a Summer, 1816, in: *The Palgrave Handbook of Climate*  
911 *History*, edited by: White, S., Pfister, C., and Mauelshagen, F., Palgrave Macmillan, London, United  
912 Kingdom, 551–561, [https://doi.org/10.1057/978-1-137-43020-5\\_35](https://doi.org/10.1057/978-1-137-43020-5_35), 2018.
- 913 Prohom, M.: Incidència de les grans erupcions volcàniques en el clima de la península Ibèrica i Balears,  
914 Ph.D. thesis, Department of Physical Geography, University of Barcelona, Spain, 226 pp.,  
915 <http://hdl.handle.net/2445/41968>, 2003.
- 916 Prohom, M., Barriendos, M., and Sanchez-Lorenzo, A.: Reconstruction and homogenization of the  
917 longest instrumental precipitation series in the Iberian Peninsula (Barcelona, 1786–2014). *Int. J.*  
918 *Climatol.*, 36(8), 3072–3087. <https://doi.org/10.1002/joc.4537>, 2016.
- 919 Raible, C.C., Brönnimann, S., Auchmann, R., Brohan, P., Frölicher, T., Graf, H.F., Jones, P.,  
920 Luterbacher, J., Muthers, S., Robock, A., Self, S., Sudrajat, A., Timmreck, C., and Wegmann, M.:  
921 Tambora 1815 as a test case for high impact volcanic eruptions: Earth system effects. *Wires Clim*  
922 *Change*, 7, 569–589, <https://doi.org/10.1002/wcc.407>, 2016.
- 923 Ramírez-Vega, M. D.: Sequías, plagas de langosta y crisis agrícola en el virreinato de Nueva España,  
924 1765–1780. Ph.D. tesis, Colegio de Michoacan, CONAHCYT, Mexico, 335 pp.,  
925 <http://colmich.repositorioinstitucional.mx/jspui/handle/1016/1140>, 2021.
- 926 Rico y Sinobas, M.: Memoria sobre las causas meteorológico-físicas que producen las constantes sequías  
927 de Murcia y Almería, señalando los medios de atenuar sus efectos, Imprenta a cargo de D. S. Compagni,  
928 Madrid, Spain, 391 pp., 1851.
- 929 Rodrigo, F. S.: Cambio climático natural: la pequeña edad de hielo en Andalucía. Reconstrucción del  
930 clima histórico a partir de fuentes documentales, Ph.D. thesis, Department of Applied Physics, University  
931 of Granada, Spain, 393 pp., <http://hdl.handle.net/10481/37533>, 1994.



- 932 Rodrigo, F. S. and Barriendos, M.: Reconstruction of seasonal and annual rainfall variability in the  
933 Iberian peninsula (16th-20th centuries) from documentary data. *Global Planet Change*, 63(2–3), 243–257,  
934 <https://doi.org/10.1016/j.gloplacha.2007.09.004>, 2008.
- 935 Rodrigo, F. S., Esteban-Parra, M.J., and Castro-Diez, Y.: An Attempt to Reconstruct the Rainfall Regime  
936 of Andalusia (Southern Spain) from 1601 A.D. to 1650 A.D. using historical documents, *Climatic*  
937 *Change*, 27, 397-418, <https://doi.org/10.1007/BF01096269>, 1994.
- 938 Rodrigo, F. S., Esteban-Parra, M.J., and Castro-Diez, Y.: Reconstruction of Total Annual Rainfall in  
939 Andalusia (Southern Spain) During the 16th and 17th Centuries from Documentary Sources, *Theor Appl*  
940 *Climatol*, 52, 207-218, <https://doi.org/10.1007/BF00864044>, 1995.
- 941 Rodrigo, F. S., Esteban-Parra, M.J., and Castro-Diez, Y.: On the use of the Jesuit order private  
942 correspondence records in climate reconstructions: a case study from Castille (Spain) for 1634-1648  
943 A.D., *Climatic Change*, 40, 625-645, <https://doi.org/10.1023/A:1005316118817.1998>.
- 944 Sánchez-Almodóvar, E., Martín-Vide, J., Olcina-Cantos, J., Lemus-Canovas, M.: Are Atmospheric  
945 Situations Now More Favourable for Heavy Rainfall in the Spanish Mediterranean? Analysis of Episodes  
946 in the Alicante Province (1981–2020). *Atmosphere*, 13(9):1410. <https://doi.org/10.3390/atmos13091410>,  
947 2022.
- 948 Serrano-Notivolí, R., Martín-Vide, J., Saz, M.A., Longares, L.A., Beguería, S., Sarricolea, P., Meseguer-  
949 Ruiz, O., de Luis, M.: Spatio-temporal variability of daily precipitation concentration in Spain based on a  
950 high-resolution gridded data set. *International Journal of Climatology* 38 (S1): e518-e530.  
951 <https://doi.org/10.1002/joc.5387>, 2018.
- 952 Sivakumar, M. V. K.: Agricultural Drought - WMO Perspectives. In M. Sivakumar, R. Motha, & D. A.  
953 Wilhite (Eds.), *Agricultural Drought Indices*. Proceedings of the WMO/UNISDR Expert Group Meeting  
954 on Agricultural Drought Indices (pp. 24–39). World Meteorological Organization, 2011.
- 955 Smerdon, J.E., et al.: Comparing data and model estimates of hydroclimate variability and change over  
956 the Common Era. *Clim Past*. 13, 1851–1900, <https://doi.org/10.5194/cp-13-1851-2017>, 2017.
- 957 Stagge, J. H., Kohn, I., Tallaksen, L. M., and Stahl, K.: Modeling drought impact occurrence based on  
958 meteorological drought indices in Europe, *J. Hydrol.*, 530, 37–50,  
959 <https://doi.org/10.1016/j.jhydrol.2015.09.039>, 2015.
- 960 Steinemann, A. C., Hayes, M. J., and Cavalcanti, L. F.: Drought indicators and triggers in: *Drought and*  
961 *Water Crises: Science, Technology, and Management Issues*, edited by: Wilhite, D. A., 71-92, 2005.
- 962 Trigo, R.M., Vaquero, J.M., Alcoforado, M.J., Barriendos, M., Taborda, J., Garcia-Herrera, R., and  
963 Luterbacher, J.: Iberia in 1816, the year without summer. *Int. J. Climatol.*, 29, 99–115,  
964 <https://doi.org/10.1002/joc.1693>, 2009.
- 965 Tejedor, E., De Luis, M., Barriendos, M., Cuadrat, J. M., Luterbacher, J., and Saz, M. Á.: Rogation  
966 ceremonies: A key to understanding past drought variability in northeastern Spain since 1650, *Clim. Past.*,  
967 15(5), 1647–1664. <https://doi.org/10.5194/cp-15-1647-2019>, 2019.
- 968 Tsakiris, G., Pangalou, D., and Vangelis, H.: Regional drought assessment based on the Reconnaissance  
969 Drought Index (RDI), *Water Resour Manage*, 21, 821-833, <https://doi.org/10.1007/s11269-006-9105-4>,  
970 2007.



- 971 Tuset, J., Barriendos, M., and Barriendos, J.: Historical Floods on the Spanish Mediterranean Basin: A  
972 Methodological Proposal for the Classification of Information at High Spatio–Temporal Resolution—  
973 AMICME Database (CE 1035–2022), *Land*, 11, 2311. <https://doi.org/10.3390/land11122311>, 2022.
- 974 Van Loon, A. F.: Hydrological drought explained, *WIREs Water*, 2(4), 359–392,  
975 <https://doi.org/10.1002/wat2.1085>, 2015.
- 976 Van Loon, A. F. and Van Lanen, H. A. J.: A process-based typology of hydrological drought, *Hydrol.*  
977 *Earth Syst. Sci.*, 16(7), 1915–1946. <https://doi.org/10.5194/hess-16-1915-2012>, 2012.
- 978 Vicente-Serrano, S. M., Beguería, S., and López-Moreno, J. I., A Multiscalar Drought Index Sensitive to  
979 Global Warming: The Standardized Precipitation Evapotranspiration Index. *Journal of climate*, 23(7),  
980 1696–1718. <https://doi.org/10.1175/2009JCLI2909.1>, 2010. Wagner, S. and Zorita, E.: The influence of  
981 volcanic, solar and CO<sub>2</sub> forcing on the temperatures in the Dalton Minimum (1790–1830): A model  
982 study. *Climate Dynamics*, 25(2–3), 205–218. <https://doi.org/10.1007/s00382-005-0029-0>, 2005.
- 983 Walker, G., Whittle, R., Medd, W., and Watson, N.: Risk Governance and Natural Hazards. CapHaz-Net  
984 WP2 Report. Lancaster Environment Centre, Lancaster University, United Kingdom, 2010.
- 985 Wilhite, D. A. and Glantz, M. H.: Understanding the drought phenomenon: The role of definitions, *Water*  
986 *International*, 10(3), 111–120. <https://doi.org/10.4324/9780429301735-2>, 1985.
- 987 WMO – World Meteorological Organization. Drought: [https://public.wmo.int/en/resources/world-](https://public.wmo.int/en/resources/world-meteorological-day/previous-world-meteorological-days/climate-and-water/drought)  
988 [meteorological-day/previous-world-meteorological-days/climate-and-water/drought](https://public.wmo.int/en/resources/world-meteorological-day/previous-world-meteorological-days/climate-and-water/drought), last access: 6 june  
989 2023.
- 990 WMO and GWP – World Meteorological Organization and Global Water Partnership: Handbook of  
991 Drought Indicators and Indices, in: Integrated Drought Management Programme (IDMP), Integrated  
992 Drought Management Tools and Guidelines Series 2, edited by: Svoboda, M. and Fuchs, B. A., Geneva,  
993 52 pp., ISBN 978-92-63-11173-9, 2016.
- 994 Xoplaki, E., Luterbacher, J., Wagner, S., Zorita, E., Fleitmann, D., Preiser-Kapeller, J., Sargent, A. M.,  
995 White, S., Toreti, A., Haldon, J. F., Mordechai, L., Bozkurt, D., Akçer-Ön, S., and Izdebski, A: Modelling  
996 climate and societal resilience in the Eastern Mediterranean in the last millennium, *Hum Ecol*, 46, 363–  
997 379. <https://doi.org/10.1007/s10745-018-9995-9>, 2018.
- 998 Zamora Pastor, R.: El final de la “Pequeña Edad del Hielo” en tierras alicantinas. University of Alicante,  
999 Alicante, Spain, 196 pp., 2002.
- 1000 Zargar, A., Sadiq, R., Naser, B., and Khan, F. I.: A review of drought indices, *Environ. Rev.*, 19(1), 333–  
1001 349. <https://doi.org/10.1139/a11-013>, 2011.
- 1002

#### 1003 DATA AVAILABILITY

1004 The historical drought data used in this paper for the period 1790–1830 are presented in a database file.

#### 1005 AUTHOR CONTRIBUTION

1006 Josep Barriendos: Data processing and analysis. Interpretation of the results. Preparation of graphic and  
1007 cartographic material.

1008 María Hernández Hernández: General revision of the texts and advice on the preparation of the materials.



1009 Salvador Gil-Guirado: Methodological approach and advice on the conceptual criteria for defining  
1010 drought.

1011 Jorge Olcina Cantos: General review and advice on the conceptual criteria for defining drought.

1012 Mariano Barriandos: Elaboration and organisation of information from historical sources.

1013

#### 1014 **COMPETING INTERESTS**

1015 The contact author has declared that none of the authors has any competing interests.

1016

#### 1017 **ACKNOWLEDGEMENTS**

1018 This article has been possible thanks to the support and finance from:

1019 - “Ayudas para estudios de Máster oficial e iniciación a la investigación (AII)”, University of Alicante.

1020 - “Ajuts Joan Oró per a la contractació de personal investigador predoctoral en formació (FI)”, year 2023.

1021 Government of Catalonia.

1022 - “Grupo de investigación de Agua y Territorio”, University of Alicante.

1023 - “Grupo de Clima y Ordenación del Territorio”, University of Alicante.

1024 - “Departamento de Análisis Geográfico Regional y Geografía Física”, University of Alicante.
